# Supplementary material for: Restricted Open-Shell Hartree–Fock Method for a General Configuration State Function Featuring Arbitrarily Complex Spin-Couplings
Source: PubMed Central journal article supplement (PMC11215774; doi:10.1021/acs.jpca.4c00688), 2024-06-17
Supplement: jp4c00688_si_001.pdf [file jp4c00688_si_001.pdf]

# Supporting Information

## **A Restricted Open-Shell Hartree-Fock Method for a General Configuration State Function Featuring Arbitrarily Complex Spin-Couplings**

Tiago Leyser da Costa Gouveia<sup>1</sup>, Dimitrios Maganas<sup>1</sup> and Frank Neese<sup>1\*</sup>

## Table of Contents

|                                                                                           |     |
|-------------------------------------------------------------------------------------------|-----|
| 1. Ni chain.....                                                                          | S3  |
| A. Geometries .....                                                                       | S3  |
| 2. [Fe(SCH <sub>3</sub> ) <sub>4</sub> ] <sup>-</sup> .....                               | S20 |
| A. Geometry.....                                                                          | S20 |
| B. Branching diagrams.....                                                                | S21 |
| C. Sample Inputs .....                                                                    | S21 |
| 3. [Fe <sub>2</sub> S <sub>2</sub> (SCH <sub>3</sub> ) <sub>4</sub> ] <sup>2-</sup> ..... | S24 |
| A. Geometry.....                                                                          | S24 |
| B. Sample Inputs .....                                                                    | S24 |
| 4. [Gd <sub>2</sub> Cl <sub>11</sub> ] <sup>5-</sup> .....                                | S27 |
| A. Geometry.....                                                                          | S27 |
| B. Molecular Orbitals .....                                                               | S27 |
| 5. [Fe <sub>4</sub> S <sub>4</sub> (SCH <sub>3</sub> ) <sub>4</sub> ] <sup>2-</sup> ..... | S29 |
| A. Geometry.....                                                                          | S29 |
| 6. [Cu <sub>3</sub> (OH) <sub>3</sub> (en) <sub>3</sub> ] <sup>3+</sup> .....             | S30 |
| A. Geometry.....                                                                          | S30 |
| 7. [Co( <sup>1</sup> L <sub>N</sub> ) <sub>2</sub> ].....                                 | S31 |
| A. Geometry.....                                                                          | S31 |

# 1. Ni chain

## A. Geometries

### i. 1 Ni:

|    |                   |                   |                   |
|----|-------------------|-------------------|-------------------|
| Ni | 0.00000000000000  | 0.00000000000000  | 0.00000000000000  |
| O  | 2.08738999752000  | 0.00000000000000  | 0.00000000000000  |
| O  | -2.08738999752000 | 0.00000004408251  | 0.00000000000000  |
| O  | -0.0000000145727  | 2.08738999752000  | 0.00000000000000  |
| O  | 0.0000000072864   | -2.08738999752000 | -0.00000000000000 |
| O  | -0.0000000072864  | 0.0000000072864   | -2.08738999752000 |
| O  | 0.0000000072864   | 0.0000000072864   | 2.08738999752000  |
| H  | 2.65763473155719  | 0.78999235683467  | -0.00000131854335 |
| H  | 2.65763485984455  | -0.78999226522986 | -0.00000000000000 |
| H  | 0.0000000076434   | 2.65763446560963  | -0.78999254420468 |
| H  | 0.00000081701211  | 2.65763458772359  | 0.78999243939734  |
| H  | -0.78999215339847 | 0.00000066219845  | 2.65763502439174  |
| H  | 0.78999239892974  | 0.0000000092769   | 2.65763469199836  |
| H  | -2.65763480169159 | 0.78999234525531  | 0.00000098542597  |
| H  | -2.65763477981872 | -0.78999227327541 | -0.00000000000000 |
| H  | -0.00000015005059 | -2.65763446565846 | 0.78999254456285  |
| H  | -0.00000085447791 | -2.65763459603914 | -0.78999243697144 |
| H  | -0.78999241156412 | -0.00000009255474 | -2.65763467469341 |
| H  | 0.78999214302993  | 0.0000000092769   | -2.65763503766959 |

### ii. 2 Ni:

|    |                   |                   |                   |
|----|-------------------|-------------------|-------------------|
| Ni | 0.00023500000000  | -0.03373900000000 | 0.01222700000000  |
| O  | 2.08762500000000  | -0.03373900000000 | 0.01238000000000  |
| O  | -2.08715500000000 | -0.03373900000000 | 0.01207400000000  |
| O  | 0.00023400000000  | 2.05353900000000  | 0.03382800000000  |
| O  | 0.00023700000000  | -2.12101700000000 | -0.00937400000000 |
| O  | 0.00038800000000  | -0.01213900000000 | -2.07505100000000 |
| O  | 0.00008300000000  | -0.05534000000000 | 2.09950500000000  |
| H  | 2.61058100000000  | 0.71468400000000  | -0.32528900000000 |
| H  | 2.56534500000000  | -0.85014500000000 | -0.21914900000000 |
| H  | -0.00163000000000 | 2.88884100000000  | -0.46497400000000 |
| H  | -0.00089600000000 | 2.23334200000000  | 0.99682200000000  |
| H  | -2.61018800000000 | 0.71460900000000  | -0.32563500000000 |
| H  | -2.56494200000000 | -0.85019200000000 | -0.21913500000000 |
| H  | -0.00038700000000 | -2.40844200000000 | 0.92301900000000  |
| H  | -0.00104300000000 | -2.88919300000000 | -0.60427300000000 |
| H  | -0.77788000000000 | 0.16732800000000  | -2.63125000000000 |
| H  | 0.77877800000000  | 0.16729300000000  | -2.63110300000000 |
| Ni | -0.00007000000000 | -0.07694100000000 | 4.18678400000000  |
| O  | -0.00007100000000 | 2.01033700000000  | 4.20838500000000  |
| O  | -0.00006900000000 | -2.16421900000000 | 4.16518300000000  |
| O  | -0.00022200000000 | -0.09854200000000 | 6.27406200000000  |
| O  | 2.08732000000000  | -0.07694100000000 | 4.18693600000000  |
| O  | -2.08746000000000 | -0.07694100000000 | 4.18663100000000  |
| H  | 0.77786000000000  | 2.56448000000000  | 4.39857400000000  |
| H  | -0.77701800000000 | 2.56455500000000  | 4.40237500000000  |
| H  | -0.78503000000000 | -2.62371100000000 | 4.51544300000000  |
| H  | 0.78502100000000  | -2.62366600000000 | 4.51521700000000  |
| H  | 0.00089400000000  | 0.65369200000000  | 6.89081700000000  |
| H  | -0.00039400000000 | -0.90243900000000 | 6.82099200000000  |
| H  | 2.69821900000000  | 0.57470400000000  | 4.57292600000000  |
| H  | 2.09496900000000  | 0.02452600000000  | 3.20133300000000  |
| H  | -2.69838200000000 | 0.57470800000000  | 4.57257500000000  |
| H  | -2.09494600000000 | 0.02444600000000  | 3.20101500000000  |

iii. 3 Ni:

|    |                   |                   |                   |
|----|-------------------|-------------------|-------------------|
| Ni | -0.02982700000000 | -0.01276000000000 | -0.00029800000000 |
| O  | 2.05735600000000  | -0.01482900000000 | -0.02964200000000 |
| O  | -2.11701000000000 | -0.01069000000000 | 0.02904700000000  |
| O  | -0.02764500000000 | 2.07461400000000  | 0.00772500000000  |
| O  | -0.03200900000000 | -2.10013300000000 | -0.00832000000000 |
| O  | -0.05916300000000 | -0.00470700000000 | -2.08746600000000 |
| O  | -0.00049100000000 | -0.02081200000000 | 2.08687100000000  |
| H  | 2.58156100000000  | 0.76700300000000  | -0.28339700000000 |
| H  | 1.95713400000000  | 0.01326100000000  | 0.96063300000000  |
| H  | 0.42762100000000  | 2.65403800000000  | -0.63063500000000 |
| H  | 0.32787200000000  | 2.24275300000000  | 0.90379900000000  |
| H  | -2.45395000000000 | 0.89258600000000  | -0.12579300000000 |
| H  | -2.05016500000000 | -0.10005400000000 | 1.01314300000000  |
| H  | -0.02157400000000 | -2.12294300000000 | 0.97976200000000  |
| H  | 0.81299100000000  | -2.50513000000000 | -0.28193300000000 |
| H  | -0.85823200000000 | -0.42713300000000 | -2.45500200000000 |
| H  | 0.69116200000000  | -0.40004200000000 | -2.56706100000000 |
| Ni | 0.02884500000000  | -0.02886500000000 | 4.17403900000000  |
| O  | 0.03102800000000  | 2.05850900000000  | 4.18206200000000  |
| O  | 0.02666300000000  | -2.11623800000000 | 4.16601600000000  |
| O  | 0.05818200000000  | -0.03691800000000 | 6.26120700000000  |
| O  | 2.11602800000000  | -0.03093400000000 | 4.14469500000000  |
| O  | -2.05833700000000 | -0.02679500000000 | 4.20338300000000  |
| H  | -0.68230600000000 | 2.53857200000000  | 4.63874800000000  |
| H  | -0.19549700000000 | 2.02716300000000  | 3.21930200000000  |
| H  | -0.89097700000000 | -2.39596700000000 | 3.98828400000000  |
| H  | 0.11777600000000  | -2.09627500000000 | 5.14794900000000  |
| H  | 2.40054300000000  | 0.88319500000000  | 4.33265500000000  |
| H  | 2.07654200000000  | -0.10517600000000 | 3.16187700000000  |
| H  | -2.00636500000000 | 0.17844500000000  | 5.17019600000000  |
| H  | -2.54573200000000 | 0.69777300000000  | 3.77292500000000  |
| Ni | 0.08751800000000  | -0.04497000000000 | 8.34837600000000  |
| O  | 0.08970000000000  | 2.04240300000000  | 8.35639800000000  |
| O  | 0.08533500000000  | -2.13234400000000 | 8.34035300000000  |
| O  | -1.99966500000000 | -0.04290100000000 | 8.37772000000000  |
| O  | 2.17470000000000  | -0.04704000000000 | 8.31903200000000  |
| O  | 0.11685300000000  | -0.05302300000000 | 10.43554400000000 |
| H  | 0.55164200000000  | 0.73567800000000  | 10.81096300000000 |
| H  | 0.51387900000000  | -0.81514800000000 | 10.89472800000000 |
| H  | -0.80858600000000 | 2.38131100000000  | 8.53407700000000  |
| H  | 0.16097700000000  | 1.99316500000000  | 7.36982800000000  |
| H  | -0.69708400000000 | -2.65468000000000 | 8.59617100000000  |
| H  | 0.04249700000000  | -2.01304500000000 | 7.35259000000000  |
| H  | -2.19089500000000 | -0.38382700000000 | 7.48086900000000  |
| H  | -2.57156900000000 | -0.49953600000000 | 9.02187800000000  |
| H  | 2.58306100000000  | -0.89721200000000 | 8.57071000000000  |
| H  | 2.17961100000000  | -0.04034000000000 | 7.33064900000000  |

iv. 4 Ni:

|    |                   |                   |                   |
|----|-------------------|-------------------|-------------------|
| Ni | 0.03694200000000  | 0.09357200000000  | 0.00222500000000  |
| O  | 2.12135500000000  | -0.01784400000000 | 0.00491200000000  |
| O  | -2.04747100000000 | 0.20498800000000  | -0.00046200000000 |
| O  | 0.14831400000000  | 2.17781900000000  | 0.02883600000000  |
| O  | -0.07443100000000 | -1.99067500000000 | -0.02438600000000 |
| O  | 0.04104500000000  | 0.12000200000000  | -2.08499300000000 |
| O  | 0.03283800000000  | 0.06714200000000  | 2.08944400000000  |
| H  | 2.06613900000000  | 0.02448100000000  | 0.99628500000000  |
| H  | 2.59947300000000  | -0.83679000000000 | -0.21611600000000 |
| H  | -0.71274800000000 | 2.60022400000000  | -0.15529600000000 |
| H  | 0.18084200000000  | 2.07133100000000  | 1.01667500000000  |

|    |                   |                   |                   |
|----|-------------------|-------------------|-------------------|
| H  | -1.93148200000000 | 0.20515300000000  | 0.99253600000000  |
| H  | -2.45300400000000 | -0.65762100000000 | -0.21171400000000 |
| H  | 0.13403100000000  | -2.01507800000000 | 0.94107000000000  |
| H  | 0.56291700000000  | -2.55589600000000 | -0.49637600000000 |
| H  | -0.79411700000000 | 0.33133800000000  | -2.53968200000000 |
| H  | 0.70572600000000  | 0.73335500000000  | -2.44979100000000 |
| Ni | 0.02873500000000  | 0.04071200000000  | 4.17666200000000  |
| O  | 0.14010700000000  | 2.12495900000000  | 4.20327400000000  |
| O  | -0.08263700000000 | -2.04353500000000 | 4.15005100000000  |
| O  | 0.02463200000000  | 0.01428200000000  | 6.26388100000000  |
| O  | 2.11314800000000  | -0.07070300000000 | 4.17934900000000  |
| O  | -2.05567800000000 | 0.15212800000000  | 4.17397500000000  |
| H  | 1.08187800000000  | 2.34074500000000  | 4.34112800000000  |
| H  | 0.05055700000000  | 2.03724900000000  | 3.21956000000000  |
| H  | -0.84478000000000 | -2.42371700000000 | 3.67878900000000  |
| H  | -0.30075900000000 | -2.03755900000000 | 5.11440900000000  |
| H  | 2.00987000000000  | -0.26205800000000 | 5.14841500000000  |
| H  | 2.30538800000000  | -0.93026400000000 | 3.76085000000000  |
| H  | -2.02164000000000 | 0.14815200000000  | 5.16421000000000  |
| H  | -2.57718300000000 | -0.62814100000000 | 3.91746800000000  |
| Ni | 0.02052800000000  | -0.01214800000000 | 8.35110000000000  |
| O  | 0.13190100000000  | 2.07209900000000  | 8.37771100000000  |
| O  | -0.09084400000000 | -2.09639500000000 | 8.32448800000000  |
| O  | -2.06388400000000 | 0.09926800000000  | 8.34841300000000  |
| O  | 2.10494100000000  | -0.12356300000000 | 8.35378700000000  |
| O  | 0.01642500000000  | -0.03857800000000 | 10.43831800000000 |
| H  | -0.54404800000000 | 2.59824300000000  | 8.83883900000000  |
| H  | -0.02409600000000 | 2.16166300000000  | 7.40756400000000  |
| H  | 0.79793500000000  | -2.38740200000000 | 8.60424700000000  |
| H  | -0.02755200000000 | -1.96685100000000 | 7.34068400000000  |
| H  | -2.41721400000000 | 0.95350100000000  | 8.04262800000000  |
| H  | -1.97217200000000 | 0.16346900000000  | 9.33395400000000  |
| H  | 2.38466700000000  | 0.71248000000000  | 8.77157900000000  |
| H  | 2.04281500000000  | 0.06940700000000  | 7.38311000000000  |
| Ni | 0.01232200000000  | -0.06500800000000 | 12.52553700000000 |
| O  | 0.12369500000000  | 2.01923900000000  | 12.55214800000000 |
| O  | -0.09905000000000 | -2.14925500000000 | 12.49892600000000 |
| O  | -2.07209100000000 | 0.04640700000000  | 12.52285000000000 |
| O  | 2.09673500000000  | -0.17642400000000 | 12.52822400000000 |
| O  | 0.00821900000000  | -0.09143800000000 | 14.61275600000000 |
| H  | 0.18414300000000  | 0.74582900000000  | 15.07853100000000 |
| H  | 0.63714700000000  | -0.73845000000000 | 14.98280400000000 |
| H  | 0.12170700000000  | 1.87545100000000  | 11.55963200000000 |
| H  | -0.74610800000000 | 2.41427500000000  | 12.75483800000000 |
| H  | -0.89278600000000 | -2.64417300000000 | 12.77005100000000 |
| H  | -0.11720000000000 | -2.10178600000000 | 11.50772600000000 |
| H  | -2.63365300000000 | -0.60027200000000 | 12.98762300000000 |
| H  | -2.05402400000000 | -0.18737500000000 | 11.56160400000000 |
| H  | 2.51568100000000  | 0.68694800000000  | 12.70603100000000 |
| H  | 2.06785300000000  | -0.25691100000000 | 11.54147900000000 |

v. 5 Ni:

|    |                   |                   |                   |
|----|-------------------|-------------------|-------------------|
| Ni | 0.12893400000000  | 0.03779500000000  | 0.00112800000000  |
| O  | 2.21517600000000  | -0.02364300000000 | 0.03304300000000  |
| O  | -1.95730700000000 | 0.09923200000000  | -0.03078800000000 |
| O  | 0.19021900000000  | 2.12425900000000  | 0.01153000000000  |
| O  | 0.06764900000000  | -2.04867000000000 | -0.00927500000000 |
| O  | 0.16114200000000  | 0.04725500000000  | -2.08599300000000 |
| O  | 0.09672700000000  | 0.02833500000000  | 2.08824800000000  |
| H  | 2.08131100000000  | -0.01020000000000 | 1.02236000000000  |
| H  | 2.52119700000000  | -0.93036300000000 | -0.16287700000000 |
| H  | -0.68844700000000 | 2.51529500000000  | -0.15503000000000 |

|    |                   |                   |                   |
|----|-------------------|-------------------|-------------------|
| H  | 0.24299300000000  | 2.02334900000000  | 1.00223900000000  |
| H  | -1.82524200000000 | 0.08916400000000  | 0.96422000000000  |
| H  | -2.48394900000000 | -0.69128300000000 | -0.24736600000000 |
| H  | -0.09252700000000 | -2.02488800000000 | 0.96929100000000  |
| H  | -0.61807700000000 | -2.59883300000000 | -0.42703400000000 |
| H  | -0.56607700000000 | 0.51881600000000  | -2.53059200000000 |
| H  | 0.97973400000000  | 0.46068400000000  | -2.41845300000000 |
| Ni | 0.06451900000000  | 0.01887600000000  | 4.17536800000000  |
| O  | 0.12580400000000  | 2.10534000000000  | 4.18577000000000  |
| O  | 0.00323400000000  | -2.06758800000000 | 4.16496600000000  |
| O  | 0.03231100000000  | 0.00941700000000  | 6.26248800000000  |
| O  | 2.15076000000000  | -0.04256100000000 | 4.20728300000000  |
| O  | -2.02172300000000 | 0.08031300000000  | 4.14345200000000  |
| H  | -0.70220500000000 | 2.33566200000000  | 3.72381100000000  |
| H  | -0.10615000000000 | 2.03716200000000  | 5.14677800000000  |
| H  | 0.19136400000000  | -2.05736600000000 | 5.13593900000000  |
| H  | 0.84852100000000  | -2.28546400000000 | 3.72904300000000  |
| H  | 2.08295600000000  | 0.18037800000000  | 5.16956300000000  |
| H  | 2.39784300000000  | 0.78585400000000  | 3.75432800000000  |
| H  | -2.00806700000000 | -0.10485800000000 | 5.11589800000000  |
| H  | -2.24128500000000 | -0.76728300000000 | 3.71423600000000  |
| Ni | 0.00010400000000  | -0.00004300000000 | 8.34960800000000  |
| O  | 0.06138900000000  | 2.08642100000000  | 8.36001000000000  |
| O  | -0.06118100000000 | -2.08650700000000 | 8.33920600000000  |
| O  | -2.08613800000000 | 0.06139500000000  | 8.31769200000000  |
| O  | 2.08634500000000  | -0.06148000000000 | 8.38152300000000  |
| O  | -0.03210400000000 | -0.00950200000000 | 10.43672800000000 |
| H  | 0.87059100000000  | 2.26962600000000  | 8.87358200000000  |
| H  | 0.34380700000000  | 2.03106200000000  | 7.41367500000000  |
| H  | -0.34335900000000 | -2.02929800000000 | 9.28560600000000  |
| H  | -0.87078900000000 | -2.26910000000000 | 7.82604600000000  |
| H  | -2.31156900000000 | 0.88347100000000  | 7.84423000000000  |
| H  | -2.01500500000000 | 0.31207900000000  | 9.27358900000000  |
| H  | 2.31002400000000  | -0.88498100000000 | 8.85333600000000  |
| H  | 2.01318500000000  | -0.31083500000000 | 7.42530300000000  |
| Ni | -0.06431100000000 | -0.01896200000000 | 12.52384800000000 |
| O  | -0.00302700000000 | 2.06750300000000  | 12.53425000000000 |
| O  | -0.12559600000000 | -2.10542600000000 | 12.51344600000000 |
| O  | -2.15055300000000 | 0.04247600000000  | 12.49193200000000 |
| O  | 2.02193000000000  | -0.08039900000000 | 12.55576400000000 |
| O  | -0.09651900000000 | -0.02842100000000 | 14.61096800000000 |
| H  | -0.18926400000000 | 2.05556500000000  | 11.56284400000000 |
| H  | -0.84912300000000 | 2.28637800000000  | 12.96806500000000 |
| H  | 0.70138800000000  | -2.34020800000000 | 12.97489600000000 |
| H  | 0.10583300000000  | -2.03894500000000 | 11.55227100000000 |
| H  | -2.39571000000000 | -0.78663200000000 | 12.94469800000000 |
| H  | -2.08109600000000 | -0.18030100000000 | 11.52962500000000 |
| H  | 2.24348600000000  | 0.76660900000000  | 12.98504200000000 |
| H  | 2.00978800000000  | 0.10449100000000  | 11.58334900000000 |
| Ni | -0.12872600000000 | -0.03788000000000 | 16.69808800000000 |
| O  | -0.06744200000000 | 2.04858400000000  | 16.70849000000000 |
| O  | -0.19001100000000 | -2.12434400000000 | 16.68768600000000 |
| O  | -2.21496800000000 | 0.02355700000000  | 16.66617300000000 |
| O  | 1.95751500000000  | -0.09931700000000 | 16.73000400000000 |
| O  | -0.16093400000000 | -0.04733900000000 | 18.78520800000000 |
| H  | -0.98005400000000 | -0.45975500000000 | 19.11763600000000 |
| H  | 0.56598000000000  | -0.51904400000000 | 19.23016800000000 |
| H  | 0.61526100000000  | 2.60188500000000  | 17.12707200000000 |
| H  | 0.09279200000000  | 2.02666700000000  | 15.72999600000000 |
| H  | 0.68864000000000  | -2.51535500000000 | 16.85440400000000 |
| H  | -0.24186700000000 | -2.02249800000000 | 15.69692900000000 |
| H  | -2.52146100000000 | 0.93005900000000  | 16.86239400000000 |
| H  | -2.08197600000000 | 0.01010500000000  | 15.67678400000000 |
| H  | 1.82176200000000  | -0.08850900000000 | 15.73511600000000 |
| H  | 2.48162500000000  | 0.69296400000000  | 16.94614599999999 |

vi. 6 Ni:

|    |                   |                   |                   |
|----|-------------------|-------------------|-------------------|
| Ni | -0.08614600000000 | 0.07092100000000  | 0.00057800000000  |
| O  | 2.00118500000000  | 0.07094800000000  | -0.01512100000000 |
| O  | -2.17347700000000 | 0.07089500000000  | 0.01627700000000  |
| O  | -0.08605400000000 | 2.15825200000000  | 0.01628700000000  |
| O  | -0.08623700000000 | -2.01641000000000 | -0.01513000000000 |
| O  | -0.10184500000000 | 0.08663000000000  | -2.08669400000000 |
| O  | -0.07044700000000 | 0.05521200000000  | 2.08785000000000  |
| H  | 1.84846900000000  | 0.06862600000000  | 0.97873400000000  |
| H  | 2.50589500000000  | -0.73767500000000 | -0.21614800000000 |
| H  | 0.80877900000000  | 2.51907600000000  | -0.13096800000000 |
| H  | -0.15376100000000 | 2.04347800000000  | 1.00626800000000  |
| H  | -2.03871200000000 | 0.08143100000000  | 1.00674400000000  |
| H  | -2.50052700000000 | -0.82883200000000 | -0.17745600000000 |
| H  | 0.04963000000000  | -1.97439900000000 | 0.96892500000000  |
| H  | 0.60813800000000  | -2.57890400000000 | -0.40080600000000 |
| H  | -0.90675200000000 | 0.52878500000000  | -2.41543000000000 |
| H  | 0.64053000000000  | 0.55086500000000  | -2.51348000000000 |
| Ni | -0.05474700000000 | 0.03950400000000  | 4.17512200000000  |
| O  | -0.05465600000000 | 2.12683500000000  | 4.19083000000000  |
| O  | -0.05483900000000 | -2.04782700000000 | 4.15941300000000  |
| O  | -0.03904800000000 | 0.02379500000000  | 6.26239400000000  |
| O  | 2.03258400000000  | 0.03953000000000  | 4.15942200000000  |
| O  | -2.14207800000000 | 0.03947700000000  | 4.19082100000000  |
| H  | 0.11106700000000  | 2.04166070000000  | 5.16730700000000  |
| H  | 0.80846600000000  | 2.33903500000000  | 3.78970700000000  |
| H  | -0.92479600000000 | -2.24413100000000 | 3.76418100000000  |
| H  | -0.21059900000000 | -1.97384500000000 | 5.13901200000000  |
| H  | 1.98068800000000  | -0.12466100000000 | 5.13667400000000  |
| H  | 2.22492500000000  | -0.82697100000000 | 3.75580600000000  |
| H  | -2.03965200000000 | 0.22586200000000  | 5.16124200000000  |
| H  | -2.35358500000000 | 0.89507800000000  | 3.77190100000000  |
| Ni | -0.02334900000000 | 0.00808700000000  | 8.34966500000000  |
| O  | -0.02325700000000 | 2.09541800000000  | 8.36537400000000  |
| O  | -0.02344100000000 | -2.07924400000000 | 8.33395700000000  |
| O  | -2.11068000000000 | 0.00806000000000  | 8.36536500000000  |
| O  | 2.06398200000000  | 0.00811300000000  | 8.33396600000000  |
| O  | -0.00765000000000 | -0.00762200000000 | 10.43693700000000 |
| H  | -0.28693500000000 | 1.99832300000000  | 9.31637900000000  |
| H  | -0.83453000000000 | 2.34108600000000  | 7.88342400000000  |
| H  | 0.23682800000000  | -2.07214100000000 | 9.28713300000000  |
| H  | 0.78963300000000  | -2.26415600000000 | 7.82779500000000  |
| H  | -2.00560800000000 | -0.23180400000000 | 7.40688600000000  |
| H  | -2.35734000000000 | -0.81860300000000 | 8.81924300000000  |
| H  | 1.99438200000000  | 0.23268700000000  | 9.29713300000000  |
| H  | 2.24727200000000  | 0.84880000000000  | 7.87370500000000  |
| Ni | 0.00804900000000  | -0.02333100000000 | 12.52420900000000 |
| O  | 0.00814100000000  | 2.06400000000000  | 12.53991700000000 |
| O  | 0.00795800000000  | -2.11066100000000 | 12.50850100000000 |
| O  | -2.07928200000000 | -0.02335700000000 | 12.53990900000000 |
| O  | 2.09538000000000  | -0.02330400000000 | 12.50851000000000 |
| O  | 0.02374800000000  | -0.03903900000000 | 14.61148100000000 |
| H  | 0.84847800000000  | 2.24771800000000  | 13.00063600000000 |
| H  | 0.23304800000000  | 1.99529100000000  | 11.57682200000000 |
| H  | -0.81850500000000 | -2.35788200000000 | 12.05457100000000 |
| H  | -0.23210600000000 | -2.00571400000000 | 13.46694100000000 |
| H  | -2.26364100000000 | 0.78972300000000  | 13.04626900000000 |
| H  | -2.07188800000000 | 0.23722100000000  | 11.58681400000000 |
| H  | 2.34071200000000  | -0.83568000000000 | 12.98877800000000 |
| H  | 1.99772600000000  | -0.28533100000000 | 11.55704900000000 |

|    |                   |                   |                   |
|----|-------------------|-------------------|-------------------|
| Ni | 0.03944800000000  | -0.05474800000000 | 16.69875300000000 |
| O  | 0.03953900000000  | 2.03258300000000  | 16.71446100000000 |
| O  | 0.03935600000000  | -2.14207900000000 | 16.68304500000000 |
| O  | -2.04788300000000 | -0.05477400000000 | 16.71445200000000 |
| O  | 2.12677900000000  | -0.05472100000000 | 16.68305300000000 |
| O  | 0.05514700000000  | -0.07045600000000 | 18.78602500000000 |
| H  | -0.82722500000000 | 2.22389500000000  | 17.11805099999999 |
| H  | -0.12446700000000 | 1.98069100000000  | 15.73717000000000 |
| H  | 0.89472400000000  | -2.35342600000000 | 17.10254600000000 |
| H  | 0.22640600000000  | -2.04031200000000 | 15.71272600000000 |
| H  | -1.97338700000000 | -0.21040900000000 | 15.73482600000000 |
| H  | -2.24227200000000 | -0.92520300000000 | 17.10965000000000 |
| H  | 2.33823800000000  | 0.80781100000000  | 17.08588700000000 |
| H  | 2.04354800000000  | 0.11217700000000  | 15.70675600000000 |
| Ni | 0.07084600000000  | -0.08616500000000 | 20.87329700000000 |
| O  | 0.07093800000000  | 2.00116600000000  | 20.88900500000000 |
| O  | 0.07075400000000  | -2.17349600000000 | 20.85758800000000 |
| O  | -2.01648500000000 | -0.08619200000000 | 20.88899599999999 |
| O  | 2.15817700000000  | -0.08613800000000 | 20.85759699999999 |
| O  | 0.08654600000000  | -0.10187400000000 | 22.96056800000000 |
| H  | 0.55080900000000  | 0.64038200000000  | 23.38751300000000 |
| H  | 0.52851100000000  | -0.90686300000000 | 23.28933400000000 |
| H  | 0.06861200000000  | 1.84824100000000  | 19.89516800000000 |
| H  | -0.73747900000000 | 2.50620600000000  | 21.08997000000000 |
| H  | -0.82895500000000 | -2.50064000000000 | 21.05119600000000 |
| H  | 0.08123600000000  | -2.03792300000000 | 19.86717800000000 |
| H  | -2.57827200000000 | 0.60866900000000  | 21.27480300000000 |
| H  | -1.97441300000000 | 0.04982900000000  | 19.90498100000000 |
| H  | 2.51878400000000  | 0.80880500000000  | 21.00467300000000 |
| H  | 2.04291700000000  | -0.15393100000000 | 19.86765300000000 |

vii. 7 Ni:

|    |                   |                   |                   |
|----|-------------------|-------------------|-------------------|
| Ni | -0.06894700000000 | 0.12001500000000  | -0.00106500000000 |
| O  | 2.01841500000000  | 0.12609000000000  | -0.00995100000000 |
| O  | -2.15630900000000 | 0.11394100000000  | 0.00782100000000  |
| O  | -0.07493500000000 | 2.20730000000000  | 0.01908600000000  |
| O  | -0.06295800000000 | -1.96726900000000 | -0.02121700000000 |
| O  | -0.07789100000000 | 0.14014100000000  | -2.08833900000000 |
| O  | -0.06000200000000 | 0.09989000000000  | 2.08620900000000  |
| H  | 1.83730500000000  | 0.13348500000000  | 0.97972900000000  |
| H  | 2.35189400000000  | -0.77186700000000 | -0.19784300000000 |
| H  | 0.81662900000000  | 2.58000800000000  | -0.11821900000000 |
| H  | -0.14220400000000 | 2.06002800000000  | 1.00352400000000  |
| H  | -2.07704600000000 | 0.16478300000000  | 0.99924300000000  |
| H  | -2.67460500000000 | -0.68782500000000 | -0.18246300000000 |
| H  | -0.21827600000000 | -1.91269100000000 | 0.95798300000000  |
| H  | -0.78082300000000 | -2.49621700000000 | -0.41176300000000 |
| H  | -0.71197500000000 | 0.80867200000000  | -2.40812500000000 |
| H  | 0.77415200000000  | 0.36650900000000  | -2.50257800000000 |
| Ni | -0.05105800000000 | 0.07976400000000  | 4.17348200000000  |
| O  | -0.05704600000000 | 2.16704800000000  | 4.19363400000000  |
| O  | -0.04507000000000 | -2.00752000000000 | 4.15333100000000  |
| O  | -0.04211400000000 | 0.05963900000000  | 6.26075600000000  |
| O  | 2.03630400000000  | 0.08583900000000  | 4.16459600000000  |
| O  | -2.13842000000000 | 0.07369000000000  | 4.18236900000000  |
| H  | 0.85098700000000  | 2.42599700000000  | 4.43619200000000  |
| H  | -0.04339200000000 | 2.06623600000000  | 3.20661000000000  |
| H  | 0.01165600000000  | -1.90743600000000 | 5.14713200000000  |
| H  | 0.76777100000000  | -2.45710900000000 | 3.86448900000000  |
| H  | 1.98182800000000  | -0.06420500000000 | 5.14626200000000  |
| H  | 2.49226100000000  | -0.67948300000000 | 3.77466500000000  |
| H  | -2.00995400000000 | 0.17072600000000  | 5.16537600000000  |
| H  | -2.37392400000000 | -0.86355400000000 | 4.05081400000000  |



|    |                   |                   |                   |
|----|-------------------|-------------------|-------------------|
| Ni | -0.03316900000000 | 0.03951300000000  | 8.34803000000000  |
| O  | -0.03915800000000 | 2.12679800000000  | 8.36818100000000  |
| O  | -0.02718100000000 | -2.04777100000000 | 8.32787900000000  |
| O  | -2.12053100000000 | 0.03343900000000  | 8.35691600000000  |
| O  | 2.05419300000000  | 0.04558800000000  | 8.33914400000000  |
| O  | -0.02422500000000 | 0.01938800000000  | 10.43530400000000 |
| H  | -0.85108500000000 | 2.29706000000000  | 8.88118700000000  |
| H  | -0.30260300000000 | 2.13059900000000  | 7.41536100000000  |
| H  | 0.14541600000000  | -1.97237000000000 | 9.30501800000000  |
| H  | 0.83997500000000  | -2.22099500000000 | 7.91701500000000  |
| H  | -2.04273900000000 | -0.25386000000000 | 7.41249200000000  |
| H  | -2.34236500000000 | -0.76416700000000 | 8.87148700000000  |
| H  | 1.93174600000000  | 0.17873100000000  | 9.32128000000000  |
| H  | 2.27269100000000  | 0.92825300000000  | 7.98808600000000  |
| Ni | -0.01528000000000 | -0.00073700000000 | 12.52257800000000 |
| O  | -0.02126900000000 | 2.08654700000000  | 12.54272900000000 |
| O  | -0.00929200000000 | -2.08802200000000 | 12.50242700000000 |
| O  | -2.10264300000000 | -0.00681200000000 | 12.53146400000000 |
| O  | 2.07208200000000  | 0.00533700000000  | 12.51369100000000 |
| O  | -0.00633600000000 | -0.02086300000000 | 14.60985200000000 |
| H  | 0.82502700000000  | 2.31468400000000  | 12.96863800000000 |
| H  | 0.17786000000000  | 2.00826500000000  | 11.57177400000000 |
| H  | -0.86152400000000 | -2.31757500000000 | 12.08933200000000 |
| H  | -0.19461800000000 | -2.01402000000000 | 13.47660800000000 |
| H  | -2.27654200000000 | 0.81754000000000  | 13.02312300000000 |
| H  | -2.04245200000000 | 0.24242300000000  | 11.57307200000000 |
| H  | 2.00441200000000  | -0.24187400000000 | 13.47270100000000 |
| H  | 2.24330600000000  | -0.82140400000000 | 12.02505700000000 |
| Ni | 0.00260900000000  | -0.04098800000000 | 16.69712500000000 |
| O  | -0.00338000000000 | 2.04629600000000  | 16.71727700000000 |
| O  | 0.00859700000000  | -2.12827200000000 | 16.67697400000000 |
| O  | -2.08475400000000 | -0.04706300000000 | 16.70601200000000 |
| O  | 2.08997100000000  | -0.03491400000000 | 16.68823900000000 |
| O  | 0.01155300000000  | -0.06111400000000 | 18.78439900000000 |
| H  | -0.87245100000000 | 2.21783000000000  | 17.12514700000000 |
| H  | -0.17490000000000 | 1.96565500000000  | 15.73985000000000 |
| H  | 0.17022600000000  | -2.10247800000000 | 17.65397500000000 |
| H  | 0.87091900000000  | -2.30839900000000 | 16.25908400000000 |
| H  | -1.96799300000000 | -0.19081200000000 | 15.72542800000000 |
| H  | -2.32401300000000 | -0.92030000000000 | 17.06759700000000 |
| H  | 2.01291200000000  | 0.27659100000000  | 17.62465400000000 |
| H  | 2.30266100000000  | 0.74881600000000  | 16.14869800000000 |
| Ni | 0.02049800000000  | -0.08123900000000 | 20.87167300000000 |
| O  | 0.01450900000000  | 2.00604500000000  | 20.89182400000000 |
| O  | 0.02648600000000  | -2.16852300000000 | 20.85152200000000 |
| O  | -2.06686500000000 | -0.08731300000000 | 20.88055900000000 |
| O  | 2.10786000000000  | -0.07516500000000 | 20.86278699999999 |
| O  | 0.02944200000000  | -0.10136400000000 | 22.95894700000000 |
| H  | -0.05358700000000 | 1.91363100000000  | 19.89895599999999 |
| H  | -0.80321900000000 | 2.43511100000000  | 21.19745099999999 |
| H  | -0.00080600000000 | -2.06422100000000 | 21.83833300000000 |
| H  | 0.94627900000000  | -2.43027200000000 | 20.65925199999999 |
| H  | -2.52866700000000 | 0.74238300000000  | 21.09160600000000 |
| H  | -1.98193500000000 | -0.11028100000000 | 19.88924900000000 |
| H  | 2.32927900000000  | 0.81778600000000  | 21.18572400000000 |
| H  | 1.95950800000000  | 0.02207500000000  | 19.87908400000000 |

|    |                   |                   |                   |
|----|-------------------|-------------------|-------------------|
| Ni | 0.03838600000000  | -0.12149000000000 | 25.04622099999999 |
| O  | 0.03239800000000  | 1.96579400000000  | 25.06637200000000 |
| O  | 0.04437500000000  | -2.20877400000000 | 25.02607000000000 |
| O  | -2.04897600000000 | -0.12756400000000 | 25.05510700000000 |
| O  | 2.12574900000000  | -0.11541500000000 | 25.03733499999999 |
| O  | 0.04733100000000  | -0.14161500000000 | 27.13349400000000 |
| H  | 0.74548700000000  | 2.50519000000000  | 25.45136800000000 |
| H  | 0.17856100000000  | 1.91361300000000  | 24.08582199999999 |
| H  | -0.84524500000000 | -2.58317600000000 | 25.17301300000000 |
| H  | 0.09409800000000  | -2.05420700000000 | 24.04120000000000 |
| H  | -2.39175800000000 | 0.76760500000000  | 25.23879799999999 |
| H  | -1.89889800000000 | -0.14792800000000 | 24.06347400000000 |
| H  | 2.01539100000000  | -0.15083200000000 | 24.04612500000000 |
| H  | 2.63001100000000  | 0.69552700000000  | 25.22712200000000 |
| H  | -0.80752800000000 | -0.35811000000000 | 27.54730600000000 |
| H  | 0.67392800000000  | -0.81643400000000 | 27.45460100000000 |

viii. 8 Ni:

|    |                   |                   |                   |
|----|-------------------|-------------------|-------------------|
| Ni | -0.08238700000000 | 0.06788100000000  | 0.00048100000000  |
| O  | 2.00497000000000  | 0.06308200000000  | -0.01028300000000 |
| O  | -2.16974400000000 | 0.07267900000000  | 0.01124400000000  |
| O  | -0.07753400000000 | 2.15523800000000  | 0.01118100000000  |
| O  | -0.08724000000000 | -2.01947600000000 | -0.01021900000000 |
| O  | -0.09312600000000 | 0.07860600000000  | -2.08685400000000 |
| O  | -0.07164800000000 | 0.05715600000000  | 2.08781500000000  |
| H  | 1.83476700000000  | 0.06593600000000  | 0.98239100000000  |
| H  | 2.51256700000000  | -0.74748100000000 | -0.19538600000000 |
| H  | 0.82240200000000  | 2.50964100000000  | -0.11886100000000 |
| H  | -0.15367600000000 | 2.02437800000000  | 1.00013600000000  |
| H  | -2.02224400000000 | 0.09177900000000  | 1.00125800000000  |
| H  | -2.49304600000000 | -0.83107000000000 | -0.16855600000000 |
| H  | 0.02927400000000  | -1.94241200000000 | 0.97698200000000  |
| H  | 0.63170200000000  | -2.57510800000000 | -0.35889900000000 |
| H  | -0.90018000000000 | 0.52773800000000  | -2.40046400000000 |
| H  | 0.64624600000000  | 0.56358400000000  | -2.49527200000000 |
| Ni | -0.06090900000000 | 0.04643100000000  | 4.17515000000000  |
| O  | -0.05605600000000 | 2.13378800000000  | 4.18585000000000  |
| O  | -0.06576300000000 | -2.04092600000000 | 4.16445000000000  |
| O  | -0.05017100000000 | 0.03570600000000  | 6.26248500000000  |
| O  | 2.02644700000000  | 0.04163300000000  | 4.16438700000000  |
| O  | -2.14826600000000 | 0.05122900000000  | 4.18591400000000  |
| H  | 0.09311800000000  | 2.02597500000000  | 5.16538300000000  |
| H  | 0.81859600000000  | 2.33093300000000  | 3.80243000000000  |
| H  | -0.94551500000000 | -2.22270800000000 | 3.78437000000000  |
| H  | -0.20807600000000 | -1.93539000000000 | 5.14610200000000  |
| H  | 1.91552600000000  | -0.09374500000000 | 5.14734000000000  |
| H  | 2.21107600000000  | -0.84236500000000 | 3.79684200000000  |
| H  | -2.04233000000000 | 0.20542700000000  | 5.16441900000000  |
| H  | -2.35134200000000 | 0.92202200000000  | 3.79604400000000  |
| Ni | -0.03943200000000 | 0.02498200000000  | 8.34982000000000  |
| O  | -0.03457800000000 | 2.11233900000000  | 8.36052000000000  |
| O  | -0.04428500000000 | -2.06237500000000 | 8.33912000000000  |
| O  | -2.12678800000000 | 0.02978000000000  | 8.36058400000000  |
| O  | 2.04792500000000  | 0.02018300000000  | 8.33905600000000  |
| O  | -0.02869300000000 | 0.01425700000000  | 10.43715500000000 |
| H  | -0.29947800000000 | 2.02660600000000  | 9.31205100000000  |
| H  | -0.85574500000000 | 2.27259700000000  | 7.85786300000000  |
| H  | 0.20881500000000  | -2.04243200000000 | 9.29478600000000  |
| H  | 0.77773300000000  | -2.21426500000000 | 7.83585700000000  |
| H  | -2.28277600000000 | -0.77326600000000 | 7.82789900000000  |
| H  | -2.05619300000000 | -0.26435900000000 | 9.30328000000000  |
| H  | 2.01335800000000  | 0.24441800000000  | 9.30277900000000  |
| H  | 2.20627400000000  | 0.85869000000000  | 7.86619800000000  |

|    |                   |                   |                   |
|----|-------------------|-------------------|-------------------|
| Ni | -0.01795400000000 | 0.00353200000000  | 12.52449000000000 |
| O  | -0.01310100000000 | 2.09088900000000  | 12.53519000000000 |
| O  | -0.02280800000000 | -2.08382500000000 | 12.51379000000000 |
| O  | -2.10531100000000 | 0.00833000000000  | 12.53525300000000 |
| O  | 2.06940300000000  | -0.00126600000000 | 12.51372600000000 |
| O  | -0.00721500000000 | -0.00719300000000 | 14.61182400000000 |
| H  | 0.75643500000000  | 2.29613700000000  | 13.09794100000000 |
| H  | 0.32458400000000  | 2.02875300000000  | 11.60721500000000 |
| H  | -0.87828800000000 | -2.29455800000000 | 12.09658700000000 |
| H  | -0.21624500000000 | -1.97809500000000 | 13.48459200000000 |
| H  | -2.23075900000000 | 0.74245200000000  | 13.16737800000000 |
| H  | -2.08489900000000 | 0.40671100000000  | 11.63336000000000 |
| H  | 1.98322900000000  | -0.21241200000000 | 13.48145600000000 |
| H  | 2.24910900000000  | -0.84855900000000 | 12.06506700000000 |
| Ni | 0.00352400000000  | -0.01791800000000 | 16.69915900000000 |
| O  | 0.00837700000000  | 2.06943900000000  | 16.70985900000000 |
| O  | -0.00133000000000 | -2.10527400000000 | 16.68845900000000 |
| O  | -2.08383300000000 | -0.01311900000000 | 16.70992300000000 |
| O  | 2.09088000000000  | -0.02271600000000 | 16.68839600000000 |
| O  | 0.01426200000000  | -0.02864200000000 | 18.78649400000000 |
| H  | -0.83807400000000 | 2.25355500000000  | 17.15831700000000 |
| H  | -0.20282500000000 | 1.98489700000000  | 15.74202800000000 |
| H  | 0.40015000000000  | -2.08796000000000 | 17.58895700000000 |
| H  | 0.73005800000000  | -2.23228800000000 | 16.05341500000000 |
| H  | -1.97921000000000 | -0.20641400000000 | 15.73899100000000 |
| H  | -2.29609600000000 | -0.86835100000000 | 17.12689800000000 |
| H  | 2.02996300000000  | 0.31603400000000  | 17.61603599999999 |
| H  | 2.29914500000000  | 0.74546100000000  | 16.12491700000000 |
| Ni | 0.02500100000000  | -0.03936700000000 | 20.87382900000000 |
| O  | 0.02985500000000  | 2.04799000000000  | 20.88452899999999 |
| O  | 0.02014800000000  | -2.12672400000000 | 20.86312900000000 |
| O  | -2.06235500000000 | -0.03456900000000 | 20.88459200000000 |
| O  | 2.11235800000000  | -0.04416500000000 | 20.86306499999999 |
| O  | 0.03574000000000  | -0.05009200000000 | 22.96116400000000 |
| H  | 0.86945700000000  | 2.20340900000000  | 21.35639099999999 |
| H  | 0.25325300000000  | 2.01032700000000  | 19.92058900000000 |
| H  | -0.27391700000000 | -2.05325400000000 | 19.92054600000000 |
| H  | -0.78383200000000 | -2.27835200000000 | 21.39567900000000 |
| H  | -2.21217100000000 | 0.78763300000000  | 21.38815000000000 |
| H  | -2.04146100000000 | 0.21880500000000  | 19.92903200000000 |
| H  | 2.26985500000000  | -0.86581500000000 | 21.36580500000000 |
| H  | 2.02644800000000  | -0.30911000000000 | 19.91160200000000 |
| Ni | 0.04647900000000  | -0.06081700000000 | 25.04849900000000 |
| O  | 0.05133200000000  | 2.02654000000000  | 25.05919800000000 |
| O  | 0.04162500000000  | -2.14817400000000 | 25.03779900000000 |
| O  | -2.04087800000000 | -0.05601800000000 | 25.05926200000000 |
| O  | 2.13383600000000  | -0.06561500000000 | 25.03773500000000 |
| O  | 0.05721700000000  | -0.07154100000000 | 27.13583300000000 |
| H  | -0.83170700000000 | 2.21572000000000  | 25.42672300000000 |
| H  | -0.08452900000000 | 1.91677800000000  | 24.07623399999999 |
| H  | 0.91166900000000  | -2.35490400000000 | 25.42744899999999 |
| H  | 0.19589300000000  | -2.04328500000000 | 24.05918899999999 |
| H  | -1.93478200000000 | -0.19860100000000 | 24.07762599999999 |
| H  | -2.22657500000000 | -0.93517900000000 | 25.43885600000000 |
| H  | 2.33643600000000  | 0.80886200000000  | 25.41863299999999 |
| H  | 2.02506200000000  | 0.08189000000000  | 24.05787300000000 |

|    |                   |                   |                   |
|----|-------------------|-------------------|-------------------|
| Ni | 0.06795600000000  | -0.08226600000000 | 29.22316800000000 |
| O  | 0.07280900000000  | 2.00509100000000  | 29.23386800000000 |
| O  | 0.06310200000000  | -2.16962300000000 | 29.21246799999999 |
| O  | -2.01940100000000 | -0.07746800000000 | 29.23393099999999 |
| O  | 2.15531300000000  | -0.08706400000000 | 29.21240500000000 |
| O  | 0.07869400000000  | -0.09299100000000 | 31.31050299999999 |
| H  | 0.07467600000000  | 1.83484600000000  | 28.24122400000000 |
| H  | -0.73539200000000 | 2.51627300000000  | 29.41946000000000 |
| H  | -0.84260900000000 | -2.48784200000000 | 29.39153499999999 |
| H  | 0.08404700000000  | -2.02266900000000 | 28.22244900000000 |
| H  | -2.57220900000000 | 0.64463300000000  | 29.58055200000000 |
| H  | -1.94004500000000 | 0.03701100000000  | 28.24648000000000 |
| H  | 2.51430500000000  | 0.81082300000000  | 29.34400800000000 |
| H  | 2.02376900000000  | -0.16092000000000 | 28.22328699999999 |
| H  | 0.56416600000000  | 0.64568600000000  | 31.71961700000000 |
| H  | 0.52661800000000  | -0.90081600000000 | 31.62390600000000 |

ix. 9 Ni:

|    |                   |                   |                   |
|----|-------------------|-------------------|-------------------|
| Ni | -0.08688900000000 | 0.10264100000000  | -0.00183700000000 |
| O  | 2.00046900000000  | 0.10729600000000  | -0.01237200000000 |
| O  | -2.17424700000000 | 0.09798500000000  | 0.00869800000000  |
| O  | -0.09148900000000 | 2.18999700000000  | 0.00922000000000  |
| O  | -0.08228900000000 | -1.98471500000000 | -0.01289400000000 |
| O  | -0.09744900000000 | 0.11367400000000  | -2.08917100000000 |
| O  | -0.07633000000000 | 0.09160700000000  | 2.08549700000000  |
| H  | 1.80653100000000  | 0.11810800000000  | 0.97568700000000  |
| H  | 2.33717200000000  | -0.79097600000000 | -0.19130600000000 |
| H  | 0.80765800000000  | 2.54943500000000  | -0.11232800000000 |
| H  | -0.16984900000000 | 2.03226100000000  | 0.99231900000000  |
| H  | -2.08002400000000 | 0.15263000000000  | 0.99924200000000  |
| H  | -2.70940500000000 | -0.69571900000000 | -0.16843000000000 |
| H  | -0.22277600000000 | -1.89975100000000 | 0.96819800000000  |
| H  | -0.82501500000000 | -2.49868100000000 | -0.37572100000000 |
| H  | -0.72512400000000 | 0.79241700000000  | -2.39961600000000 |
| H  | 0.75895400000000  | 0.34618300000000  | -2.49061700000000 |
| Ni | -0.06577000000000 | 0.08057400000000  | 4.17283200000000  |
| O  | -0.07037000000000 | 2.16793000000000  | 4.18388800000000  |
| O  | -0.06117000000000 | -2.00678200000000 | 4.16177500000000  |
| O  | -0.05521100000000 | 0.06954000000000  | 6.26016600000000  |
| O  | 2.02158800000000  | 0.08522900000000  | 4.16229700000000  |
| O  | -2.15312800000000 | 0.07591800000000  | 4.18336700000000  |
| H  | 0.82893700000000  | 2.41941400000000  | 4.46370200000000  |
| H  | -0.01906200000000 | 2.06167300000000  | 3.19868200000000  |
| H  | -0.00440800000000 | -1.88800700000000 | 5.15553100000000  |
| H  | 0.75366100000000  | -2.45782200000000 | 3.88092000000000  |
| H  | 1.95208800000000  | -0.05993800000000 | 5.14530900000000  |
| H  | 2.46433000000000  | -0.69200100000000 | 3.78086600000000  |
| H  | -2.01497600000000 | 0.17577800000000  | 5.16592100000000  |
| H  | -2.38384300000000 | -0.86316100000000 | 4.05677400000000  |
| Ni | -0.04465100000000 | 0.05850700000000  | 8.34750000000000  |
| O  | -0.04925100000000 | 2.14586300000000  | 8.35855700000000  |
| O  | -0.04005100000000 | -2.02884900000000 | 8.33644300000000  |
| O  | -2.13200900000000 | 0.05385100000000  | 8.35803500000000  |
| O  | 2.04270700000000  | 0.06316200000000  | 8.33696500000000  |
| O  | -0.03409200000000 | 0.04747300000000  | 10.43483400000000 |
| H  | -0.84297800000000 | 2.29546000000000  | 8.90585900000000  |
| H  | -0.34876300000000 | 2.14156800000000  | 7.41688200000000  |
| H  | 0.12670800000000  | -1.92758700000000 | 9.31457300000000  |
| H  | 0.83289800000000  | -2.19175000000000 | 7.93361800000000  |
| H  | -2.06152700000000 | -0.28759900000000 | 7.43237000000000  |
| H  | -2.32693600000000 | -0.71296300000000 | 8.92806600000000  |
| H  | 1.91101400000000  | 0.19947400000000  | 9.31854800000000  |
| H  | 2.24595000000000  | 0.94818600000000  | 7.98253500000000  |

|    |                   |                   |                   |
|----|-------------------|-------------------|-------------------|
| Ni | -0.02353200000000 | 0.03644000000000  | 12.52216800000000 |
| O  | -0.02813200000000 | 2.12379600000000  | 12.53322500000000 |
| O  | -0.01893200000000 | -2.05091600000000 | 12.51111100000000 |
| O  | -2.11089000000000 | 0.03178400000000  | 12.53270300000000 |
| O  | 2.06382600000000  | 0.04109600000000  | 12.51163300000000 |
| O  | -0.01297300000000 | 0.02540600000000  | 14.60950200000000 |
| H  | 0.81549900000000  | 2.34361000000000  | 12.96874300000000 |
| H  | 0.18095200000000  | 2.02866600000000  | 11.56484000000000 |
| H  | -0.87483800000000 | -2.26424200000000 | 12.09681600000000 |
| H  | -0.20656400000000 | -1.95305000000000 | 13.48411600000000 |
| H  | -2.26223300000000 | 0.84896500000000  | 13.04414700000000 |
| H  | -2.04240600000000 | 0.29986500000000  | 11.57971500000000 |
| H  | 1.99573900000000  | -0.19441400000000 | 13.47411400000000 |
| H  | 2.22181700000000  | -0.79335800000000 | 12.03168200000000 |
| Ni | -0.00241300000000 | 0.01437300000000  | 16.69683600000000 |
| O  | -0.00701300000000 | 2.10172900000000  | 16.70789300000000 |
| O  | 0.00218700000000  | -2.07298300000000 | 16.68577900000000 |
| O  | -2.08977100000000 | 0.00971700000000  | 16.70737100000000 |
| O  | 2.08494500000000  | 0.01902900000000  | 16.68630100000000 |
| O  | 0.00814600000000  | 0.00334000000000  | 18.78417000000000 |
| H  | -0.83193900000000 | 2.25468600000000  | 17.20604300000000 |
| H  | -0.25901700000000 | 2.04548500000000  | 15.75005300000000 |
| H  | 0.25369500000000  | -2.01659000000000 | 17.64378400000000 |
| H  | 0.82763300000000  | -2.22429100000000 | 16.18796600000000 |
| H  | -1.99167500000000 | -0.18446100000000 | 15.73570400000000 |
| H  | -2.30628500000000 | -0.84161500000000 | 17.12929199999999 |
| H  | 1.98686400000000  | 0.21085800000000  | 17.65850900000000 |
| H  | 2.30095200000000  | 0.87164600000000  | 16.26675100000000 |
| Ni | 0.01870600000000  | -0.00769400000000 | 20.87150500000000 |
| O  | 0.01410600000000  | 2.07966200000000  | 20.88256100000000 |
| O  | 0.02330600000000  | -2.09505000000000 | 20.86044799999999 |
| O  | -2.06865200000000 | -0.01235000000000 | 20.88204000000000 |
| O  | 2.10606400000000  | -0.00303800000000 | 20.86097000000000 |
| O  | 0.02926500000000  | -0.01872700000000 | 22.95883900000000 |
| H  | 0.86802300000000  | 2.29375200000000  | 21.30050600000000 |
| H  | 0.20467900000000  | 1.98408200000000  | 19.91013300000000 |
| H  | -0.82312800000000 | -2.31291200000000 | 20.42939600000000 |
| H  | -0.18170600000000 | -1.99697600000000 | 21.82977300000000 |
| H  | -2.22758600000000 | 0.81877200000000  | 21.36751200000000 |
| H  | -2.00342800000000 | 0.22845400000000  | 19.92098099999999 |
| H  | 2.03584800000000  | -0.26201700000000 | 21.81673700000000 |
| H  | 2.25890800000000  | -0.82520800000000 | 20.35816000000000 |
| Ni | 0.03982500000000  | -0.02976100000000 | 25.04617300000000 |
| O  | 0.03522500000000  | 2.05759500000000  | 25.05723000000000 |
| O  | 0.04442500000000  | -2.11711700000000 | 25.03511600000000 |
| O  | -2.04753300000000 | -0.03441600000000 | 25.05670800000000 |
| O  | 2.12718300000000  | -0.02510500000000 | 25.03563800000000 |
| O  | 0.05038400000000  | -0.04079400000000 | 27.13350699999999 |
| H  | -0.82387500000000 | 2.22275400000000  | 25.48872500000000 |
| H  | -0.15552300000000 | 1.96755900000000  | 24.08379699999999 |
| H  | 0.33501600000000  | -2.11044700000000 | 25.97994600000000 |
| H  | 0.84328100000000  | -2.26628700000000 | 24.49523900000000 |
| H  | -1.91914200000000 | -0.17408900000000 | 24.07571000000000 |
| H  | -2.26125300000000 | -0.91570000000000 | 25.41389100000000 |
| H  | 2.02449400000000  | 0.27598900000000  | 25.97501900000000 |
| H  | 2.31890700000000  | 0.77014900000000  | 24.50506300000000 |
| Ni | 0.06094400000000  | -0.05182800000000 | 29.22084099999999 |
| O  | 0.05634400000000  | 2.03552800000000  | 29.23189800000000 |
| O  | 0.06554400000000  | -2.13918300000000 | 29.20978400000000 |
| O  | -2.02641400000000 | -0.05648300000000 | 29.23137599999999 |
| O  | 2.14830200000000  | -0.04717200000000 | 29.21030599999999 |
| O  | 0.07150300000000  | -0.06286100000000 | 31.30817499999999 |

|    |                   |                   |                   |
|----|-------------------|-------------------|-------------------|
| H  | 0.85323900000000  | 2.46125100000000  | 29.59253799999999 |
| H  | 0.18257500000000  | 1.94584100000000  | 28.24505900000000 |
| H  | -0.84984500000000 | -2.37507700000000 | 28.97133699999999 |
| H  | 0.05704400000000  | -2.01659600000000 | 30.19569600000000 |
| H  | -2.22744100000000 | 0.81012500000000  | 29.63071800000000 |
| H  | -1.94614800000000 | 0.10580100000000  | 28.25277000000000 |
| H  | 2.60191300000000  | 0.80682600000000  | 29.32087900000000 |
| H  | 1.99808700000000  | -0.15107400000000 | 28.22734600000000 |
| Ni | 0.08206300000000  | -0.07389400000000 | 33.39550900000000 |
| O  | 0.07746300000000  | 2.01346200000000  | 33.40656600000000 |
| O  | 0.08666300000000  | -2.16124900000000 | 33.38445300000000 |
| O  | -2.00529500000000 | -0.07854900000000 | 33.40604500000000 |
| O  | 2.16942100000000  | -0.06923800000000 | 33.38497400000000 |
| O  | 0.09262300000000  | -0.08492600000000 | 35.48284400000000 |
| H  | -0.81139500000000 | 2.37779000000000  | 33.57780700000000 |
| H  | 0.10149100000000  | 1.87842800000000  | 32.41814900000000 |
| H  | -0.63007800000000 | -2.73779000000000 | 33.70323600000000 |
| H  | -0.01919700000000 | -2.05188700000000 | 32.40151000000000 |
| H  | -2.52148300000000 | -0.88084100000000 | 33.60362300000000 |
| H  | -1.82964700000000 | -0.09965600000000 | 32.41612600000000 |
| H  | 2.49755100000000  | -0.97120300000000 | 33.56434700000000 |
| H  | 2.03618600000000  | -0.04975300000000 | 32.39548200000000 |
| H  | 0.89676500000000  | 0.36773600000000  | 35.79837000000000 |
| H  | -0.64981800000000 | 0.39328800000000  | 35.89328200000000 |

**x. 10 Ni:**

|    |                   |                   |                   |
|----|-------------------|-------------------|-------------------|
| Ni | -0.08067600000000 | -0.03164800000000 | -0.05728200000000 |
| O  | 2.00656300000000  | -0.05422400000000 | -0.06839200000000 |
| O  | -2.16791400000000 | -0.00907300000000 | -0.04617200000000 |
| O  | -0.05811700000000 | 2.05561700000000  | -0.06041500000000 |
| O  | -0.10323400000000 | -2.11891400000000 | -0.05415100000000 |
| O  | -0.09181900000000 | -0.03466000000000 | -2.14464000000000 |
| O  | -0.06953300000000 | -0.02863700000000 | 2.03007600000000  |
| H  | 2.52074600000000  | 0.75502800000000  | -0.24047700000000 |
| H  | 1.82096900000000  | -0.05898700000000 | 0.92310400000000  |
| H  | 0.67937700000000  | 2.60479800000000  | -0.37936900000000 |
| H  | 0.04218400000000  | 1.94960000000000  | 0.92777800000000  |
| H  | -2.47517300000000 | 0.90239200000000  | -0.21395900000000 |
| H  | -2.00821200000000 | -0.03791700000000 | 0.94253700000000  |
| H  | -0.17808000000000 | -1.97441000000000 | 0.93414400000000  |
| H  | 0.79437600000000  | -2.48172500000000 | -0.17609200000000 |
| H  | -0.90437900000000 | -0.48294100000000 | -2.44500400000000 |
| H  | 0.64091600000000  | -0.54056900000000 | -2.53935600000000 |
| Ni | -0.05839000000000 | -0.02562500000000 | 4.11743400000000  |
| O  | -0.03583100000000 | 2.06164100000000  | 4.11430200000000  |
| O  | -0.08094800000000 | -2.11289100000000 | 4.12056600000000  |
| O  | -0.04724600000000 | -0.02261300000000 | 6.20479200000000  |
| O  | 2.02884900000000  | -0.04820000000000 | 4.10632400000000  |
| O  | -2.14562800000000 | -0.00305000000000 | 4.12854400000000  |
| H  | -0.17506600000000 | 1.94872900000000  | 5.09648800000000  |
| H  | -0.91672700000000 | 2.24695900000000  | 3.73868900000000  |
| H  | 0.79552900000000  | -2.31282700000000 | 3.74305800000000  |
| H  | 0.06290100000000  | -2.00303400000000 | 5.10191900000000  |
| H  | 1.90448500000000  | 0.07742000000000  | 5.09099100000000  |
| H  | 2.21724900000000  | 0.83969500000000  | 3.75053700000000  |
| H  | -2.03251300000000 | -0.14997100000000 | 5.10884200000000  |
| H  | -2.35274000000000 | -0.87648000000000 | 3.74712400000000  |
| Ni | -0.03610300000000 | -0.01960200000000 | 8.29215000000000  |
| O  | -0.01354500000000 | 2.06766400000000  | 8.28901800000000  |
| O  | -0.05866200000000 | -2.10686800000000 | 8.29528200000000  |
| O  | -2.12334200000000 | 0.00297300000000  | 8.30326000000000  |
| O  | 2.05113500000000  | -0.04217700000000 | 8.28104000000000  |
| O  | -0.02496000000000 | -0.01659000000000 | 10.37950800000000 |

|    |                   |                   |                   |
|----|-------------------|-------------------|-------------------|
| H  | 0.19221300000000  | 1.98019900000000  | 9.25792300000000  |
| H  | 0.83939700000000  | 2.20950900000000  | 7.83731000000000  |
| H  | -0.25367400000000 | -2.01745700000000 | 9.26611900000000  |
| H  | -0.91576800000000 | -2.25697600000000 | 7.85427200000000  |
| H  | -2.02057300000000 | 0.20285700000000  | 9.27256800000000  |
| H  | -2.27322700000000 | 0.85835100000000  | 7.85885200000000  |
| H  | 2.19292900000000  | -0.90084700000000 | 7.84034100000000  |
| H  | 1.95583400000000  | -0.23648100000000 | 9.25265100000000  |
| Ni | -0.01381700000000 | -0.01357900000000 | 12.46686600000000 |
| O  | 0.00874100000000  | 2.07368700000000  | 12.46373400000000 |
| O  | -0.03637600000000 | -2.10084400000000 | 12.46999800000000 |
| O  | -2.10105600000000 | 0.00899600000000  | 12.47797600000000 |
| O  | 2.07342100000000  | -0.03615400000000 | 12.45575600000000 |
| O  | -0.00267400000000 | -0.01056700000000 | 14.55422400000000 |
| H  | -0.20446700000000 | 2.00797800000000  | 13.43112100000000 |
| H  | -0.83640200000000 | 2.23577800000000  | 12.00402800000000 |
| H  | 0.80170200000000  | -2.26265900000000 | 11.99730900000000 |
| H  | 0.18963000000000  | -2.03785700000000 | 13.43414500000000 |
| H  | -2.00612200000000 | -0.25664700000000 | 13.42965500000000 |
| H  | -2.25189000000000 | -0.81135200000000 | 11.97094400000000 |
| H  | 2.03307000000000  | 0.20290900000000  | 13.41620800000000 |
| H  | 2.22615300000000  | 0.79372900000000  | 11.96595900000000 |
| Ni | 0.00846900000000  | -0.00755500000000 | 16.64158200000000 |
| O  | 0.03102800000000  | 2.07971000000000  | 16.63845000000000 |
| O  | -0.01409000000000 | -2.09482100000000 | 16.64471400000000 |
| O  | -2.07877000000000 | 0.01502000000000  | 16.65269200000000 |
| O  | 2.09570700000000  | -0.03013000000000 | 16.63047200000000 |
| O  | 0.01961200000000  | -0.00454400000000 | 18.72894000000000 |
| H  | 0.24618900000000  | 1.99654000000000  | 17.60551100000000 |
| H  | 0.87753900000000  | 2.23823700000000  | 16.18025800000000 |
| H  | -0.20316400000000 | -1.98539600000000 | 17.61641700000000 |
| H  | -0.87394900000000 | -2.28246300000000 | 16.22544300000000 |
| H  | -2.24131200000000 | 0.73436000000000  | 17.29157100000000 |
| H  | -2.02179000000000 | 0.42803400000000  | 15.75703100000000 |
| H  | 2.25299100000000  | -0.89124500000000 | 16.20033700000000 |
| H  | 2.01208600000000  | -0.21473700000000 | 17.60427400000000 |
| Ni | 0.03075500000000  | -0.00153200000000 | 20.81629800000000 |
| O  | 0.05331400000000  | 2.08573400000000  | 20.81316700000000 |
| O  | 0.00819600000000  | -2.08879800000000 | 20.81943000000000 |
| O  | -2.05648300000000 | 0.02104300000000  | 20.82740799999999 |
| O  | 2.11799300000000  | -0.02410700000000 | 20.80518899999999 |
| O  | 0.04189800000000  | 0.00148000000000  | 22.90365700000000 |
| H  | -0.13365900000000 | 1.97195000000000  | 21.78599100000000 |
| H  | -0.80056000000000 | 2.31563900000000  | 20.40355300000000 |
| H  | 0.85286400000000  | -2.26369000000000 | 20.36395100000000 |
| H  | 0.22226100000000  | -2.00639400000000 | 21.78700100000000 |
| H  | -2.27959700000000 | -0.80626500000000 | 21.29138300000000 |
| H  | -1.94079800000000 | -0.22395100000000 | 19.86854400000000 |
| H  | 2.03665100000000  | 0.20156300000000  | 21.76970000000000 |
| H  | 2.27999700000000  | 0.81572500000000  | 20.33572299999999 |
| Ni | 0.05304100000000  | 0.00449100000000  | 24.99101500000000 |
| O  | 0.07560000000000  | 2.09175700000000  | 24.98788300000000 |
| O  | 0.03048200000000  | -2.08277400000000 | 24.99414600000000 |
| O  | -2.03419700000000 | 0.02706600000000  | 25.00212400000000 |
| O  | 2.14027900000000  | -0.01808400000000 | 24.97990500000000 |
| O  | 0.06418400000000  | 0.00750300000000  | 27.07837299999999 |
| H  | 0.33163700000000  | 2.00485700000000  | 25.94382400000000 |
| H  | 0.90358100000000  | 2.23881800000000  | 24.49360600000000 |
| H  | -0.07789400000000 | -1.95346600000000 | 25.97857899999999 |
| H  | -0.85649400000000 | -2.29841500000000 | 24.65389900000000 |
| H  | -2.23130200000000 | 0.89705700000000  | 25.39449400000000 |
| H  | -1.90280800000000 | 0.20073400000000  | 24.02730700000000 |
| H  | 2.21983900000000  | -0.71421500000000 | 24.29704499999999 |
| H  | 2.19233600000000  | -0.46052300000000 | 25.85539600000000 |

|    |                   |                   |                   |
|----|-------------------|-------------------|-------------------|
| Ni | 0.07532700000000  | 0.01051500000000  | 29.16573100000000 |
| O  | 0.09788600000000  | 2.09778000000000  | 29.16259900000000 |
| O  | 0.05276800000000  | -2.07675100000000 | 29.16886300000000 |
| O  | -2.01191100000000 | 0.03309000000000  | 29.17684100000000 |
| O  | 2.16256600000000  | -0.01206100000000 | 29.15462100000000 |
| O  | 0.08647000000000  | 0.01352600000000  | 31.25308900000000 |
| H  | -0.07293000000000 | 2.05819600000000  | 30.13715000000000 |
| H  | -0.74399400000000 | 2.35381400000000  | 28.74525199999999 |
| H  | -0.80183200000000 | -2.48598000000000 | 28.94747200000000 |
| H  | 0.06413200000000  | -1.93623400000000 | 30.15706000000000 |
| H  | -2.42682800000000 | -0.76042400000000 | 29.55672300000000 |
| H  | -1.90522900000000 | -0.12400800000000 | 28.19540399999999 |
| H  | 2.41554200000000  | 0.89803800000000  | 29.39786599999999 |
| H  | 1.98624600000000  | 0.02988300000000  | 28.17144599999999 |
| Ni | 0.09761300000000  | 0.01653800000000  | 33.34044700000000 |
| O  | 0.12017200000000  | 2.10380300000000  | 33.33731500000000 |
| O  | 0.07505400000000  | -2.07072800000000 | 33.34357900000000 |
| O  | -1.98962500000000 | 0.03911300000000  | 33.35155700000000 |
| O  | 2.18485200000000  | -0.00603800000000 | 33.32933700000000 |
| O  | 0.10875600000000  | 0.01955000000000  | 35.42780500000000 |
| H  | 0.19155100000000  | 1.97000800000000  | 34.32004000000000 |
| H  | -0.80856900000000 | 2.36204400000000  | 33.19014400000000 |
| H  | -0.72673200000000 | -2.53591000000000 | 33.63885400000000 |
| H  | -0.00348500000000 | -1.93485800000000 | 32.35492300000000 |
| H  | -2.41188600000000 | -0.78171500000000 | 33.65767100000000 |
| H  | -1.85160600000000 | -0.04280100000000 | 32.36064700000000 |
| H  | 2.42139600000000  | -0.91894300000000 | 33.57767400000000 |
| H  | 2.11417500000000  | -0.01501600000000 | 32.33829400000000 |
| Ni | 0.11990000000000  | 0.02256300000000  | 37.51516300000000 |
| O  | 0.14245800000000  | 2.10982900000000  | 37.51202900000000 |
| O  | 0.09734100000000  | -2.06470300000000 | 37.51829800000000 |
| O  | -1.96733900000000 | 0.04513800000000  | 37.52627700000000 |
| O  | 2.20713800000000  | -0.00001200000000 | 37.50405600000000 |
| O  | 0.13104300000000  | 0.02557700000000  | 39.60252099999999 |
| H  | 0.12540900000000  | 1.89931800000000  | 36.52886700000000 |
| H  | -0.62977000000000 | 2.67958800000000  | 37.68239200000000 |
| H  | -0.81795100000000 | -2.36563700000000 | 37.67201299999999 |
| H  | 0.16416100000000  | -1.94158500000000 | 36.53238600000000 |
| H  | -2.47654000000000 | 0.80287400000000  | 37.86322900000000 |
| H  | -1.85644200000000 | 0.16481400000000  | 36.54112700000000 |
| H  | 2.58636200000000  | 0.88609000000000  | 37.65710900000000 |
| H  | 2.08783500000000  | -0.04423100000000 | 36.51392000000000 |
| H  | 0.61491500000000  | 0.77347200000000  | 39.99633099999998 |
| H  | 0.59645200000000  | -0.77319300000000 | 39.91338999999999 |



## 2. [Fe(SCH<sub>3</sub>)<sub>4</sub>]<sup>-</sup>

### A. Geometry

|    |                    |                    |                    |
|----|--------------------|--------------------|--------------------|
| Fe | 0.000000000000000  | 0.000000000000000  | 0.000000000000000  |
| S  | -1.344228763000000 | -1.344264597000000 | 1.229154000000000  |
| S  | 1.344264597000000  | -1.344228763000000 | -1.229154000000000 |
| S  | 1.344228763000000  | 1.344264597000000  | 1.229154000000000  |
| S  | -1.344264597000000 | 1.344228763000000  | -1.229154000000000 |
| C  | -0.234560888000000 | -2.195782737000000 | 2.286572000000000  |
| C  | 2.195782737000000  | -0.234560888000000 | -2.286572000000000 |
| C  | 0.234560888000000  | 2.195782737000000  | 2.286572000000000  |
| C  | -2.195782737000000 | 0.234560888000000  | -2.286572000000000 |
| H  | 0.551446256000000  | -2.504371013000000 | 1.789726000000000  |
| H  | -0.699297872000000 | -2.925393241000000 | 2.714291000000000  |
| H  | -0.081683162000000 | -1.555481654000000 | 3.096647000000000  |
| H  | 2.504371013000000  | 0.551446256000000  | -1.789726000000000 |
| H  | 2.925393241000000  | -0.699297872000000 | -2.714291000000000 |
| H  | 1.555481654000000  | -0.081683162000000 | -3.096647000000000 |
| H  | -0.551446256000000 | 2.504371013000000  | 1.789726000000000  |
| H  | 0.699297872000000  | 2.925393241000000  | 2.714291000000000  |
| H  | 0.081683162000000  | 1.555481654000000  | 3.096647000000000  |
| H  | -2.504371013000000 | -0.551446256000000 | -1.789726000000000 |
| H  | -2.925393241000000 | 0.699297872000000  | -2.714291000000000 |
| H  | -1.555481654000000 | 0.081683162000000  | -3.096647000000000 |

## B. Branching diagrams

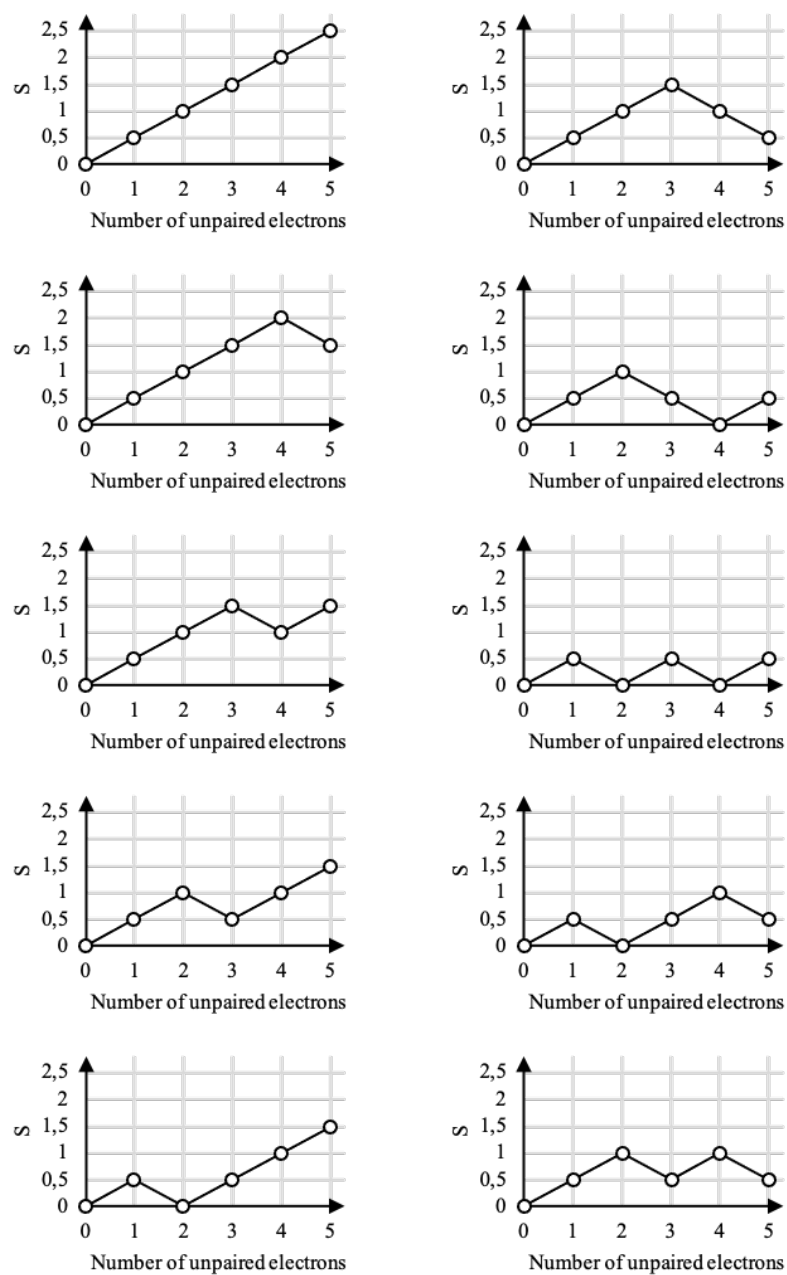

**Figure S1.** Branching diagrams for the sextet, quartet and doublet multiplicities of  $[\text{Fe}(\text{SCH}_3)_4]^-$ .

## C. Sample Inputs

SAHF calculation for 5 electrons in 5 orbitals and  $S = \frac{3}{2}$  of  $[\text{Fe}(\text{SCH}_3)_4]^-$ , using AVAS for the initial guess orbitals:

```

# [Fe(SCH3)4]- Quartet SAHF

! Def2-TZVP TightSCF

%pal
nproc 8
end

%scf
avas
system
norb 5
nel 5
center 0
type d
end
end
HFTyp ROHF
ROHF_CASE SAHF
ROHF_NumOp 2
ROHF_NEL[1] 5
ROHF_NORB[1] 5
end

*xyz -1 4
Fe 0.000000000000000 0.000000000000000 0.000000000000000
S -1.344228763000000 -1.344264597000000 1.229154000000000
S 1.344264597000000 -1.344228763000000 -1.229154000000000
S 1.344228763000000 1.344264597000000 1.229154000000000
S -1.344264597000000 1.344228763000000 -1.229154000000000
C -0.234560888000000 -2.195782737000000 2.286572000000000
C 2.195782737000000 -0.234560888000000 -2.286572000000000
C 0.234560888000000 2.195782737000000 2.286572000000000
C -2.195782737000000 0.234560888000000 -2.286572000000000
H 0.551446256000000 -2.504371013000000 1.789726000000000
H -0.699297872000000 -2.925393241000000 2.714291000000000
H -0.081683162000000 -1.555481654000000 3.096647000000000
H 2.504371013000000 0.551446256000000 -1.789726000000000
H 2.925393241000000 -0.699297872000000 -2.714291000000000
H 1.555481654000000 -0.081683162000000 -3.096647000000000
H -0.551446256000000 2.504371013000000 1.789726000000000
H 0.699297872000000 2.925393241000000 2.714291000000000
H 0.081683162000000 1.555481654000000 3.096647000000000
H -2.504371013000000 -0.551446256000000 -1.789726000000000
H -2.925393241000000 0.699297872000000 -2.714291000000000
H -1.555481654000000 0.081683162000000 -3.096647000000000
end

```

CSF-ROHF calculation for the CSF  $[+ + - + +]$  with  $S = \frac{3}{2}$  of  $[\text{Fe}(\text{SCH}_3)_4]^-$ , using the converged SAHF orbitals as initial guess:

```

# [Fe(SCH3)4]- Quartet ROHF [++-++] CSF

! Def2-TZVP TightSCF MOREAD

%moinp "fesch3_quart_sahf.gbw"

%pal
nproc 8
end

%scf
HFTyp ROHF
ROHF_CASE USER_CSF
ROHF_REF {1 1 -1 1 1} end
MaxIter 1000
end

*xyz -1 4
Fe 0.000000000000000 0.000000000000000 0.000000000000000
S -1.34422876300000 -1.34426459700000 1.229154000000000
S 1.34426459700000 -1.34422876300000 -1.229154000000000
S 1.34422876300000 1.34426459700000 1.229154000000000
S -1.34426459700000 1.34422876300000 -1.229154000000000
C -0.23456088800000 -2.19578273700000 2.286572000000000
C 2.19578273700000 -0.23456088800000 -2.286572000000000
C 0.23456088800000 2.19578273700000 2.286572000000000
C -2.19578273700000 0.23456088800000 -2.286572000000000
H 0.55144625600000 -2.50437101300000 1.789726000000000
H -0.69929787200000 -2.92539324100000 2.714291000000000
H -0.08168316200000 -1.55548165400000 3.096647000000000
H 2.50437101300000 0.55144625600000 -1.789726000000000
H 2.92539324100000 -0.69929787200000 -2.714291000000000
H 1.55548165400000 -0.08168316200000 -3.096647000000000
H -0.55144625600000 2.50437101300000 1.789726000000000
H 0.69929787200000 2.92539324100000 2.714291000000000
H 0.08168316200000 1.55548165400000 3.096647000000000
H -2.50437101300000 -0.55144625600000 -1.789726000000000
H -2.92539324100000 0.69929787200000 -2.714291000000000
H -1.55548165400000 0.08168316200000 -3.096647000000000
end

```

### 3. $[\text{Fe}_2\text{S}_2(\text{SCH}_3)_4]^{2-}$

#### A. Geometry

|    |                    |                    |                   |
|----|--------------------|--------------------|-------------------|
| Fe | 0.0000000000000000 | 0.0000000000000000 | -1.34356781200000 |
| Fe | 0.0000000000000000 | 0.0000000000000000 | 1.34356781200000  |
| S  | 1.07173350100000   | 1.37336608200000   | 0.00000000000000  |
| S  | 1.34671428400000   | -1.34590148600000  | -2.65162144900000 |
| S  | -1.34671428400000  | 1.34590148600000   | -2.65162144900000 |
| S  | -1.07173350100000  | -1.37336608200000  | 0.00000000000000  |
| S  | -1.34671428400000  | 1.34590148600000   | 2.65162144900000  |
| S  | 1.34671428400000   | -1.34590148600000  | 2.65162144900000  |
| C  | -2.48566330400000  | 0.36254339300000   | -3.60079527600000 |
| H  | -3.31993751600000  | 0.59673175500000   | -3.50588279500000 |
| H  | -2.34744650700000  | 0.38829290300000   | -4.46338059000000 |
| H  | -2.47240470900000  | -0.48571120300000  | -3.40416734300000 |
| C  | 2.48566330400000   | -0.36254339300000  | -3.60079527600000 |
| H  | 3.31993751600000   | -0.59673175500000  | -3.50588279500000 |
| H  | 2.34744650700000   | -0.38829290300000  | -4.46338059000000 |
| H  | 2.47240470900000   | 0.48571120300000   | -3.40416734300000 |
| C  | 2.48566330400000   | -0.36254339300000  | 3.60079527600000  |
| H  | 2.34744650700000   | -0.38829290300000  | 4.46338059000000  |
| H  | 3.31993751600000   | -0.59673175500000  | 3.50588279500000  |
| H  | 2.47240470900000   | 0.48571120300000   | 3.40416734300000  |
| C  | -2.48566330400000  | 0.36254339300000   | 3.60079527600000  |
| H  | -3.31993751600000  | 0.59673175500000   | 3.50588279500000  |
| H  | -2.47240470900000  | -0.48571120300000  | 3.40416734300000  |
| H  | -2.34744650700000  | 0.38829290300000   | 4.46338059000000  |

#### B. Sample Inputs

SAHF calculation for 10 electrons in 10 orbitals and  $S = 0$  of  $[\text{Fe}_2\text{S}_2(\text{SCH}_3)_4]^{2-}$ , using AVAS for the initial guess orbitals:

```

# [Fe2S2(SCH3)4]2- SAHF with AVAS Guess Orbitals

! Def2-TZVP TightSCF

%pal
nproc 8
end

%scf
avas
system
nel 10
norb 10
center 0,1
type d,d
end
end
HFTyp ROHF
ROHF_Case SAHF
ROHF_NumOp 2
ROHF_NEL[1] 10
ROHF_NORB[1] 10
end

*xyz -2 1
Fe 0.000000000 0.000000000 -1.343567812
Fe 0.000000000 0.000000000 1.343567812
S 1.071733501 1.373366082 0.000000000
S 1.346714284 -1.345901486 -2.651621449
S -1.346714284 1.345901486 -2.651621449
S -1.071733501 -1.373366082 0.000000000
S -1.346714284 1.345901486 2.651621449
S 1.346714284 -1.345901486 2.651621449
C -2.485663304 0.362543393 -3.600795276
H -3.319937516 0.596731755 -3.505882795
H -2.347446507 0.388292903 -4.463380590
H -2.472404709 -0.485711203 -3.404167343
C 2.485663304 -0.362543393 -3.600795276
H 3.319937516 -0.596731755 -3.505882795
H 2.347446507 -0.388292903 -4.463380590
H 2.472404709 0.485711203 -3.404167343
C 2.485663304 -0.362543393 3.600795276
H 2.347446507 -0.388292903 4.463380590
H 3.319937516 -0.596731755 3.505882795
H 2.472404709 0.485711203 3.404167343
C -2.485663304 0.362543393 3.600795276
H -3.319937516 0.596731755 3.505882795
H -2.472404709 -0.485711203 3.404167343
H -2.347446507 0.388292903 4.463380590
end

```

CSF-ROHF calculation for the CSF [++++--] with  $S = 0$  of  $[\text{Fe}_2\text{S}_2(\text{SCH}_3)_4]^{2-}$ , using the converged SAHF orbitals as initial guess:

```

# [Fe2S2(SCH3)4]2- AF-ROHF with localized SAHF orbitals

! Def2-TZVP TightSCF MOREAD

%moinp "fe2sch_sahf.loc"

%pal
nproc 8
end

%scf
Rotate {88,94,90} {92,96,90} end
HFTyp ROHF
ROHF_Case AF_CSF
ROHF_AFORBS 5,5
MaxIter 500
end

*xyz -2 1
Fe 0.000000000 0.000000000 -1.343567812
Fe 0.000000000 0.000000000 1.343567812
S 1.071733501 1.373366082 0.000000000
S 1.346714284 -1.345901486 -2.651621449
S -1.346714284 1.345901486 -2.651621449
S -1.071733501 -1.373366082 0.000000000
S -1.346714284 1.345901486 2.651621449
S 1.346714284 -1.345901486 2.651621449
C -2.485663304 0.362543393 -3.600795276
H -3.319937516 0.596731755 -3.505882795
H -2.347446507 0.388292903 -4.463380590
H -2.472404709 -0.485711203 -3.404167343
C 2.485663304 -0.362543393 -3.600795276
H 3.319937516 -0.596731755 -3.505882795
H 2.347446507 -0.388292903 -4.463380590
H 2.472404709 0.485711203 -3.404167343
C 2.485663304 -0.362543393 3.600795276
H 2.347446507 -0.388292903 4.463380590
H 3.319937516 -0.596731755 3.505882795
H 2.472404709 0.485711203 3.404167343
C -2.485663304 0.362543393 3.600795276
H -3.319937516 0.596731755 3.505882795
H -2.472404709 -0.485711203 3.404167343
H -2.347446507 0.388292903 4.463380590
end

```

## 4. $[\text{Gd}_2\text{Cl}_{11}]^{5-}$

### A. Geometry

|    |                   |                   |                   |
|----|-------------------|-------------------|-------------------|
| Cl | 2.82651000000000  | 0.00000000000000  | 0.00000000000000  |
| Cl | 0.00000000000000  | 2.82651000000000  | 0.00000000000000  |
| Cl | 0.00000000000000  | -2.82651000000000 | -0.00000000000000 |
| Cl | 0.00000000000000  | 0.00000000000000  | -2.82651000000000 |
| Cl | 0.00000000000000  | -0.00000000000000 | 2.82651000000000  |
| Cl | -2.82651000000000 | 0.00000000000000  | 0.00000000000000  |
| Cl | -5.65302000000000 | 2.82651000000000  | 0.00000000000000  |
| Cl | -5.65302000000000 | -2.82651000000000 | -0.00000000000000 |
| Cl | -5.65302000000000 | 0.00000000000000  | -2.82651000000000 |
| Cl | -5.65302000000000 | 0.00000000000000  | 2.82651000000000  |
| Cl | -8.47953000000000 | 0.00000000000000  | 0.00000000000000  |
| Gd | 0.00000000000000  | 0.00000000000000  | 0.00000000000000  |
| Gd | -5.65302000000000 | 0.00000000000000  | 0.00000000000000  |

### B. Molecular Orbitals

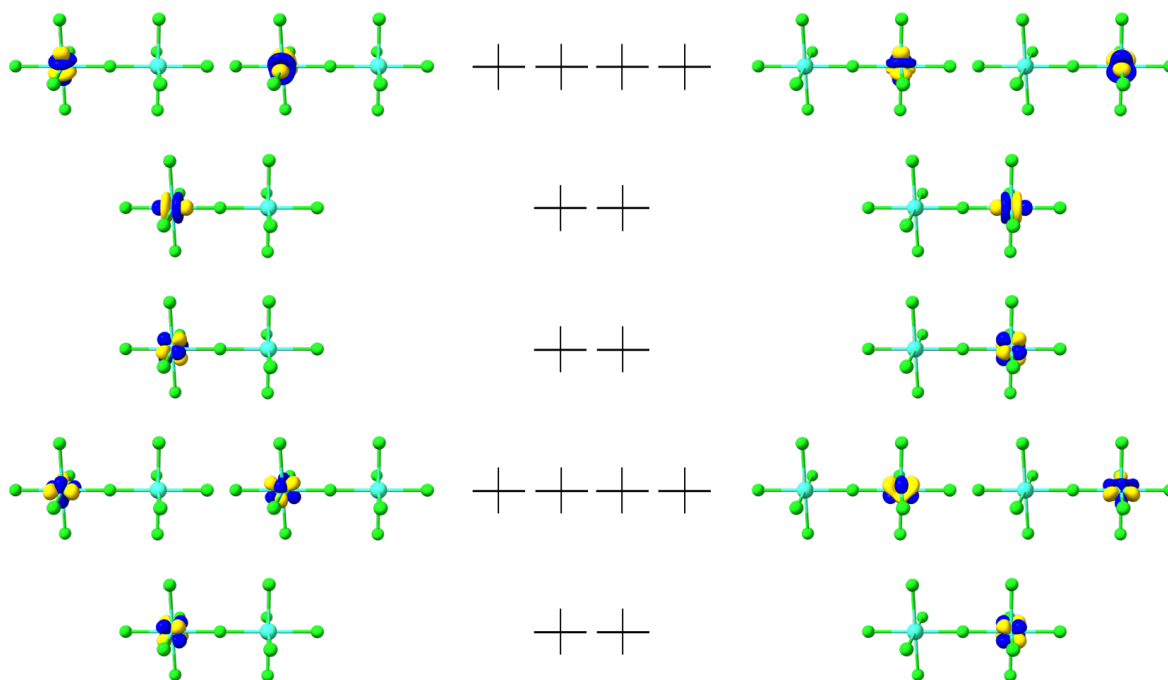

**Figure S2.** CSF-ROHF molecular orbitals for the CSF  $[+++++-----]$  of  $[\text{Gd}_2\text{Cl}_{11}]^{5-}$ .



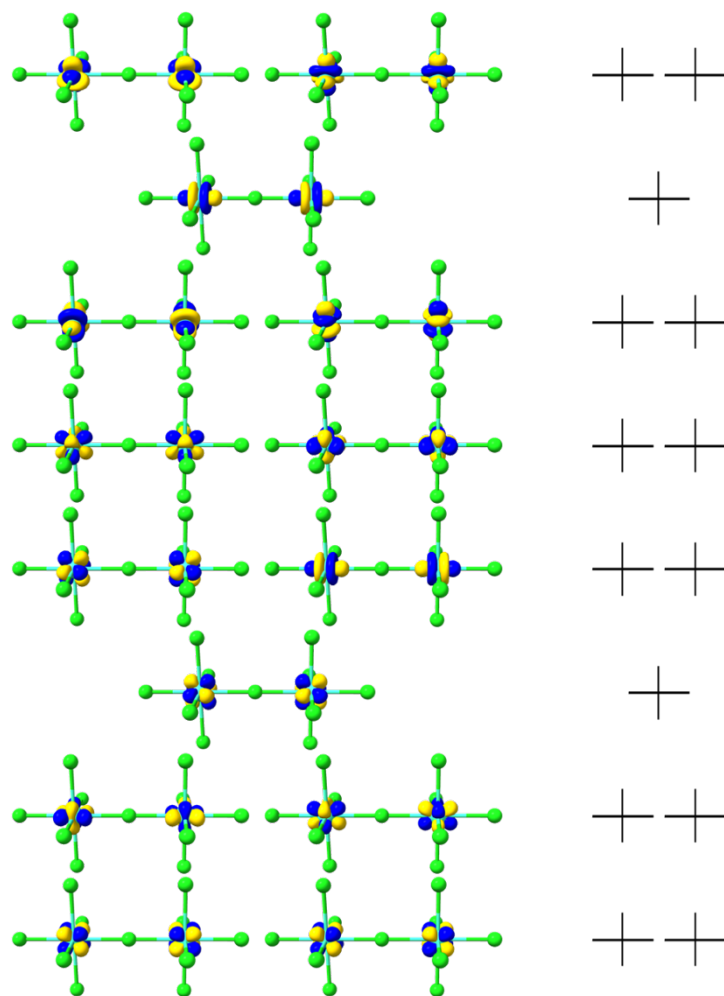

**Figure S3.** HS-ROHF molecular orbitals for  $[\text{Gd}_2\text{Cl}_{11}]^{5-}$ .

## 5. $[\text{Fe}_4\text{S}_4(\text{SCH}_3)_4]^{2-}$

### A. Geometry

|    |                   |                   |                   |
|----|-------------------|-------------------|-------------------|
| S  | 0.04000000000000  | -1.78000000000000 | -1.29000000000000 |
| S  | -0.04000000000000 | 1.78000000000000  | -1.29000000000000 |
| S  | 1.78000000000000  | -0.04000000000000 | 1.29000000000000  |
| S  | -1.78000000000000 | 0.04000000000000  | 1.29000000000000  |
| Fe | 0.05000000000000  | -1.37000000000000 | 1.01000000000000  |
| Fe | -1.38000000000000 | 0.05000000000000  | -1.00000000000000 |
| Fe | -0.05000000000000 | 1.38000000000000  | 1.00000000000000  |
| Fe | 1.37000000000000  | -0.05000000000000 | -1.01000000000000 |
| S  | 0.24000000000000  | 3.30000000000000  | 2.14000000000000  |
| S  | -0.24000000000000 | -3.29000000000000 | 2.14000000000000  |
| S  | -3.29000000000000 | -0.24000000000000 | -2.14000000000000 |
| S  | 3.29000000000000  | 0.24000000000000  | -2.14000000000000 |
| C  | -3.80000000000000 | -1.84000000000000 | -1.38000000000000 |
| H  | -3.91000000000000 | -1.71000000000000 | -0.29000000000000 |
| H  | -4.76000000000000 | -2.17000000000000 | -1.81000000000000 |
| H  | -3.03000000000000 | -2.60000000000000 | -1.56000000000000 |
| C  | 3.80000000000000  | 1.83000000000000  | -1.38000000000000 |
| H  | 3.91000000000000  | 1.71000000000000  | -0.29000000000000 |
| H  | 4.76000000000000  | 2.16000000000000  | -1.81000000000000 |
| H  | 3.03000000000000  | 2.59000000000000  | -1.55000000000000 |
| C  | -1.83000000000000 | -3.80000000000000 | 1.38000000000000  |
| H  | -2.16000000000000 | -4.76000000000000 | 1.81000000000000  |
| H  | -2.59000000000000 | -3.03000000000000 | 1.55000000000000  |
| H  | -1.70000000000000 | -3.91000000000000 | 0.29000000000000  |
| C  | 1.84000000000000  | 3.80000000000000  | 1.38000000000000  |
| H  | 2.17000000000000  | 4.76000000000000  | 1.81000000000000  |
| H  | 2.60000000000000  | 3.03000000000000  | 1.56000000000000  |
| H  | 1.71000000000000  | 3.91000000000000  | 0.29000000000000  |

## 6. $[\text{Cu}_3(\text{OH})_3(\text{en})_3]^{3+}$

### A. Geometry

|    |                   |                   |                   |
|----|-------------------|-------------------|-------------------|
| Cu | 0.07390700000000  | 1.73092000000000  | 0.01728100000000  |
| Cu | 1.81809500000000  | -1.29635400000000 | -0.06114800000000 |
| Cu | -1.76965100000000 | -1.21814100000000 | 0.07267000000000  |
| O  | -1.11343200000000 | 0.44627400000000  | 0.92915300000000  |
| O  | 1.23194000000000  | 0.41405300000000  | -0.88164600000000 |
| O  | 0.00802500000000  | -2.01785300000000 | -0.04229800000000 |
| H  | -0.67662500000000 | 0.15321200000000  | 1.75194100000000  |
| H  | 0.84086100000000  | 0.17106800000000  | -1.74256200000000 |
| H  | -0.01157100000000 | -2.97021000000000 | 0.15205400000000  |
| N  | -0.62089900000000 | 3.27656000000000  | 1.18293300000000  |
| N  | 0.82029800000000  | 3.26233500000000  | -1.13975700000000 |
| C  | -0.52146500000000 | 4.56387700000000  | 0.42541700000000  |
| H  | -1.58160500000000 | 3.09354300000000  | 1.48805800000000  |
| C  | 0.77778000000000  | 4.54127000000000  | -0.36247200000000 |
| H  | -0.56199500000000 | 5.43010500000000  | 1.10083200000000  |
| H  | -1.38740900000000 | 4.62578800000000  | -0.24858200000000 |
| H  | 1.77207700000000  | 3.04496800000000  | -1.45056000000000 |
| H  | 1.64541000000000  | 4.55438200000000  | 0.31203600000000  |
| H  | 0.85628700000000  | 5.41479800000000  | -1.02501300000000 |
| H  | 0.25669200000000  | 3.35170300000000  | -1.99421900000000 |
| H  | -0.05715100000000 | 3.32866500000000  | 2.04053600000000  |
| N  | 3.76166100000000  | -0.70464200000000 | -0.29823400000000 |
| N  | 2.69106900000000  | -2.94869100000000 | 0.83010000000000  |
| C  | 4.12438700000000  | -2.63407000000000 | 1.13987200000000  |
| H  | 2.20605000000000  | -3.26122700000000 | 1.67785100000000  |
| C  | 4.68937700000000  | -1.84646900000000 | -0.02897100000000 |
| H  | 4.70222700000000  | -3.55162700000000 | 1.32005400000000  |
| H  | 4.14384100000000  | -2.03907700000000 | 2.06385900000000  |
| H  | 4.73442000000000  | -2.46528500000000 | -0.93626000000000 |
| H  | 5.70837200000000  | -1.49381700000000 | 0.18460900000000  |
| H  | 3.89700700000000  | -0.32506600000000 | -1.24067700000000 |
| H  | 3.94736000000000  | 0.07036700000000  | 0.34860100000000  |
| H  | 2.64871500000000  | -3.73410900000000 | 0.16832600000000  |
| N  | -2.72036100000000 | -2.88368800000000 | -0.70205800000000 |
| N  | -3.66319300000000 | -0.44825300000000 | 0.09463100000000  |
| C  | -4.66373900000000 | -1.54643800000000 | -0.08398300000000 |
| H  | -3.81394600000000 | 0.06029000000000  | 0.97155200000000  |
| C  | -4.10940100000000 | -2.50669200000000 | -1.12204100000000 |
| H  | -5.64255200000000 | -1.15021300000000 | -0.38851000000000 |
| H  | -4.79163500000000 | -2.04603500000000 | 0.88649400000000  |
| H  | -4.04250600000000 | -2.02529900000000 | -2.10774600000000 |
| H  | -4.74848100000000 | -3.39476100000000 | -1.22706700000000 |
| H  | -2.20327300000000 | -3.28730700000000 | -1.49016700000000 |
| H  | -2.76412000000000 | -3.61553600000000 | 0.01812800000000  |
| H  | -3.75470400000000 | 0.24348600000000  | -0.65837700000000 |

## 7. [Co(<sup>1</sup>L<sub>N</sub>)<sub>2</sub>]

### A. Geometry

|    |                   |                   |                   |
|----|-------------------|-------------------|-------------------|
| Co | 0.19114500000000  | -0.17442700000000 | -0.06452000000000 |
| N  | 1.55368800000000  | 1.05392800000000  | -0.06859800000000 |
| N  | 1.55831300000000  | -1.39562900000000 | -0.13419400000000 |
| N  | -1.17597600000000 | 1.04675200000000  | 0.00680900000000  |
| N  | -1.17128200000000 | -1.40292200000000 | -0.05634000000000 |
| C  | 2.82159500000000  | -0.88598400000000 | -0.15190100000000 |
| H  | 1.49470000000000  | -2.41478500000000 | -0.15872200000000 |
| C  | 2.81865900000000  | 0.55037000000000  | -0.11335200000000 |
| C  | 4.03879100000000  | 1.25450100000000  | -0.12470900000000 |
| C  | 4.04451700000000  | -1.58355000000000 | -0.20029800000000 |
| C  | 5.23765700000000  | -0.86651400000000 | -0.21031000000000 |
| C  | 5.23482300000000  | 0.54392300000000  | -0.17277100000000 |
| C  | -2.43909900000000 | 0.53691400000000  | 0.03167800000000  |
| H  | -1.11233700000000 | 2.06589900000000  | 0.03213300000000  |
| C  | -2.43609700000000 | -0.89954800000000 | -0.00493100000000 |
| C  | -3.65606000000000 | -1.60389300000000 | 0.01389000000000  |
| C  | -4.85196200000000 | -0.89344700000000 | 0.06773700000000  |
| C  | -4.85485600000000 | 0.51707400000000  | 0.10352800000000  |
| C  | -3.66189700000000 | 1.23433000000000  | 0.08609200000000  |
| H  | -5.80501200000000 | 1.05123300000000  | 0.14563700000000  |
| H  | -3.66543000000000 | 2.32626900000000  | 0.11374600000000  |
| H  | -3.65494800000000 | -2.69584600000000 | -0.01371600000000 |
| H  | -5.79991900000000 | -1.43294400000000 | 0.08247400000000  |
| H  | 6.18291400000000  | 1.08325500000000  | -0.18162400000000 |
| H  | 4.03773600000000  | 2.34638000000000  | -0.09539200000000 |
| H  | 4.04801700000000  | -2.67541700000000 | -0.22961200000000 |
| H  | 6.18790900000000  | -1.40080600000000 | -0.24754300000000 |
| H  | -1.10390200000000 | -2.42178200000000 | -0.08253700000000 |
| H  | 1.48644500000000  | 2.07268600000000  | -0.03874500000000 |
